# Supplementary material for: Learning induces the translin/trax RNase complex to express activin receptors for persistent memory
Source: eLife. 2017 Sep 20;6:e27872. doi: 10.7554/eLife.27872 (PMC5606845; doi:10.7554/eLife.27872)
Supplement: Figure 3—source data 2. — Conserved mRNA targets of miR-125 between humans and mice. Conserved mRNA targets of miR-128 between humans & mice. [file elife-27872-fig3-data2.xlsx]

## Sheet: Sheet1
Figure 3–Table Supplement 1. Conserved mRNA targets of let-7 between humans and mice.
RefSeq_ID	Gene Name
NM_000024	adrenoceptor beta 2(ADRB2)
NM_000025	adrenoceptor beta 3(ADRB3)
NM_000084	chloride voltage-gated channel 5(CLCN5)
NM_000088	collagen type I alpha 1 chain(COL1A1)
NM_000089	collagen type I alpha 2 chain(COL1A2)
NM_000090	collagen type III alpha 1 chain(COL3A1)
NM_000103	cytochrome P450 family 19 subfamily A member 1(CYP19A1)
NM_000109	dystrophin(DMD)
NM_000124	ERCC excision repair 6, chromatin remodeling factor(ERCC6)
NM_000163	growth hormone receptor(GHR)
NM_000189	hexokinase 2(HK2)
NM_000192	T-box 5(TBX5)
NM_000208	insulin receptor(INSR)
NM_000212	integrin subunit beta 3(ITGB3)
NM_000321	RB transcriptional corepressor 1(RB1)
NM_000335	sodium voltage-gated channel alpha subunit 5(SCN5A)
NM_000337	sarcoglycan delta(SGCD)
NM_000368	tuberous sclerosis 1(TSC1)
NM_000393	collagen type V alpha 2 chain(COL5A2)
NM_000403	UDP-galactose-4-epimerase(GALE)
NM_000427	loricrin(LOR)
NM_000495	collagen type IV alpha 5 chain(COL4A5)
NM_000555	doublecortin(DCX)
NM_000565	interleukin 6 receptor(IL6R)
NM_000572	interleukin 10(IL10)
NM_000600	interleukin 6(IL6)
NM_000618	insulin like growth factor 1(IGF1)
NM_000639	Fas ligand(FASLG)
NM_000684	adrenoceptor beta 1(ADRB1)
NM_000720	calcium voltage-gated channel subunit alpha1 D(CACNA1D)
NM_000721	calcium voltage-gated channel subunit alpha1 E(CACNA1E)
NM_000811	gamma-aminobutyric acid type A receptor alpha6 subunit(GABRA6)
NM_000870	5-hydroxytryptamine receptor 4(HTR4)
NM_000875	insulin like growth factor 1 receptor(IGF1R)
NM_000914	opioid receptor mu 1(OPRM1)
NM_000952	platelet activating factor receptor(PTAFR)
NM_001001349	NFKB inhibitor interacting Ras like 2(NKIRAS2)
NM_001001396	ATPase plasma membrane Ca2+ transporting 4(ATP2B4)
NM_001001523	RAR related orphan receptor C(RORC)
NM_001001557	growth differentiation factor 6(GDF6)
NM_001001928	peroxisome proliferator activated receptor alpha(PPARA)
NM_001002296	golgin A7(GOLGA7)
NM_001002838	WNK lysine deficient protein kinase 3(WNK3)
NM_001003652	SMAD family member 2(SMAD2)
NM_001003760	kelch like family member 31(KLHL31)
NM_001003794	monoglyceride lipase(MGLL)
NM_001003809	DLG associated protein 1(DLGAP1)
NM_001004196	CD200 molecule(CD200)
NM_001004304	zinc finger protein 740(ZNF740)
NM_001004317	lin-28 homolog B(LIN28B)
NM_001004330	pleckstrin homology and RhoGEF domain containing G7(PLEKHG7)
NM_001004342	tripartite motif containing 67(TRIM67)
NM_001004354	NOTCH-regulated ankyrin repeat protein(NRARP)
NM_001005158	Scm-like with four mbt domains 1(SFMBT1)
NM_001005473	phosphatidylinositol specific phospholipase C X domain containing 3(PLCXD3)
NM_001005502	carboxypeptidase M(CPM)
NM_001005609	ectodysplasin A(EDA)
NM_001007225	insulin like growth factor 2 mRNA binding protein 2(IGF2BP2)
NM_001007246	bromodomain and WD repeat domain containing 1(BRWD1)
NM_001007257	PR/SET domain 2(PRDM2)
NM_001008405	B-cell receptor associated protein 29(BCAP29)
NM_001008738	folliculin interacting protein 1(FNIP1)
NM_001009185	acyl-CoA synthetase long-chain family member 6(ACSL6)
NM_001009813	Meis homeobox 3(MEIS3)
NM_001009880	KIAA0930(KIAA0930)
NM_001009984	chromosome 20 open reading frame 194(C20orf194)
NM_001010000	Rho GTPase activating protein 28(ARHGAP28)
NM_001010887	alkaline ceramidase 2(ACER2)
NM_001011547	solute carrier family 5 member 9(SLC5A9)
NM_001011713	N(alpha)-acetyltransferase 30, NatC catalytic subunit(NAA30)
NM_001012754	NHL repeat containing 3(NHLRC3)
NM_001012994	sorting nexin family member 30(SNX30)
NM_001013690	fidgetin like 2(FIGNL2)
NM_001013842	chromosome 8 open reading frame 58(C8orf58)
NM_001014283	defective in cullin neddylation 1 domain containing 2(DCUN1D2)
NM_001014443	ubiquitin specific peptidase 21(USP21)
NM_001014449	DEAD-box helicase 19B(DDX19B)
NM_001017440	calneuron 1(CALN1)
NM_001017923	chromosome 14 open reading frame 28(C14orf28)
NM_001017989	optic atrophy 3 (autosomal recessive, with chorea and spastic paraplegia)(OPA3)
NM_001018057	dickkopf WNT signaling pathway inhibitor 3(DKK3)
NM_001018108	small EDRK-rich factor 2(SERF2)
NM_001023570	IQ motif containing B1(IQCB1)
NM_001024401	SH3 domain binding kinase 1(SBK1)
NM_001024736	CD276 molecule(CD276)
NM_001024808	BCL tumor suppressor 7A(BCL7A)
NM_001029859	potassium channel tetramerization domain containing 21(KCTD21)
NM_001029998	solute carrier family 10 member 7(SLC10A7)
NM_001031681	cystinosin, lysosomal cystine transporter(CTNS)
NM_001031695	RNA binding protein, fox-1 homolog 2(RBFOX2)
NM_001031696	phospholipase D family member 3(PLD3)
NM_001031711	endoplasmic reticulum-golgi intermediate compartment 1(ERGIC1)
NM_001032283	thymopoietin(TMPO)
NM_001032296	serine/threonine kinase 24(STK24)
NM_001033081	v-myc avian myelocytomatosis viral oncogene lung carcinoma derived homolog(MYCL)
NM_001033117	SLIT-ROBO Rho GTPase activating protein 3(SRGAP3)
NM_001033518	WD repeat domain, phosphoinositide interacting 2(WIPI2)
NM_001034	ribonucleotide reductase regulatory subunit M2(RRM2)
NM_001037174	ADP ribosylation factor like GTPase 5A(ARL5A)
NM_001039111	tripartite motif containing 71(TRIM71)
NM_001039570	kringle containing transmembrane protein 1(KREMEN1)
NM_001039573	SEC14 like lipid binding 1(SEC14L1)
NM_001039574	potassium voltage-gated channel subfamily C member 4(KCNC4)
NM_001039770	transmembrane protein with metallophosphoesterase domain(TMPPE)
NM_001039840	cysteine rich hydrophobic domain 1(CHIC1)
NM_001040000	afadin, adherens junction formation factor(AFDN)
NM_001040125	PQ loop repeat containing 2(PQLC2)
NM_001040152	paternally expressed 10(PEG10)
NM_001040712	protein tyrosine phosphatase, receptor type D(PTPRD)
NM_001040715	KIAA0895 like(KIAA0895L)
NM_001042403	ubiquitin specific peptidase 44(USP44)
NM_001042417	RUN and FYVE domain containing 2(RUFY2)
NM_001042475	centrosomal protein 85 like(CEP85L)
NM_001042486	DLG associated protein 4(DLGAP4)
NM_001042546	ATP synthase mitochondrial F1 complex assembly factor 1(ATPAF1)
NM_001042555	fibroblast growth factor receptor substrate 2(FRS2)
NM_001042559	eukaryotic translation initiation factor 4 gamma 2(EIF4G2)
NM_001042604	5'-3' exoribonuclease 1(XRN1)
NM_001066	TNF receptor superfamily member 1B(TNFRSF1B)
NM_001077181	cell division cycle 14B(CDC14B)
NM_001077199	splicing regulatory glutamic acid and lysine rich protein 1(SREK1)
NM_001079526	IKAROS family zinc finger 2(IKZF2)
NM_001079533	cytoplasmic polyadenylation element binding protein 1(CPEB1)
NM_001079673	fibronectin type III domain containing 3A(FNDC3A)
NM_001079874	vav guanine nucleotide exchange factor 3(VAV3)
NM_001079911	dentin matrix acidic phosphoprotein 1(DMP1)
NM_001080392	KIAA1147(KIAA1147)
NM_001080431	solute carrier family 45 member 4(SLC45A4)
NM_001080470	zinc finger protein 697(ZNF697)
NM_001080485	zinc finger protein 275(ZNF275)
NM_001080541	MGA, MAX dimerization protein(MGA)
NM_001081550	THO complex 2(THOC2)
NM_001081559	cleavage and polyadenylation specific factor 4(CPSF4)
NM_001082969	chromosome 11 open reading frame 57(C11orf57)
NM_001083588	E2F transcription factor 5(E2F5)
NM_001085471	forkhead box N3(FOXN3)
NM_001093725	mex-3 RNA binding family member A(MEX3A)
NM_001098202	HIC ZBTB transcriptional repressor 1(HIC1)
NM_001098484	solute carrier family 4 member 4(SLC4A4)
NM_001098832	family with sequence similarity 104 member A(FAM104A)
NM_001098833	ataxin 7 like 3(ATXN7L3)
NM_001099272	BTB domain containing 9(BTBD9)
NM_001099287	NIPA like domain containing 4(NIPAL4)
NM_001099666	protein prenyltransferase alpha subunit repeat containing 1(PTAR1)
NM_001099784	F-box and leucine rich repeat protein 19(FBXL19)
NM_001100	actin, alpha 1, skeletal muscle(ACTA1)
NM_001100164	phosphatase and actin regulator 2(PHACTR2)
NM_001100819	MOB family member 4, phocein(MOB4)
NM_001100913	phosphofurin acidic cluster sorting protein 2(PACS2)
NM_001101372	IgLON family member 5(IGLON5)
NM_001101676	sterile alpha motif domain containing 12(SAMD12)
NM_001102594	deltex E3 ubiquitin ligase 2(DTX2)
NM_001104595	family with sequence similarity 118 member A(FAM118A)
NM_001105193	APC membrane recruitment protein 3(AMER3)
NM_001105243	protocadherin 19(PCDH19)
NM_001105251	zinc finger FYVE-type containing 16(ZFYVE16)
NM_001105518	SWT1, RNA endoribonuclease homolog(SWT1)
NM_001105530	adenylate cyclase associated protein 1(CAP1)
NM_001105531	family with sequence similarity 135 member A(FAM135A)
NM_001105539	zinc finger and BTB domain containing 10(ZBTB10)
NM_001105541	neurofilament, medium polypeptide(NEFM)
NM_001106	activin A receptor type 2B(ACVR2B)
NM_001109662	HECT domain E3 ubiquitin protein ligase 4(HECTD4)
NM_001109763	GSG1 like(GSG1L)
NM_001111031	activin A receptor type 1C(ACVR1C)
NM_001112736	family with sequence similarity 208 member A(FAM208A)
NM_001113239	homeodomain interacting protein kinase 2(HIPK2)
NM_001113490	angiomotin(AMOT)
NM_001116	adenylate cyclase 9(ADCY9)
NM_001122838	N-acyl phosphatidylethanolamine phospholipase D(NAPEPLD)
NM_001126054	calcium/calmodulin dependent serine protein kinase(CASK)
NM_001127197	E74 like ETS transcription factor 4(ELF4)
NM_001127208	tet methylcytosine dioxygenase 2(TET2)
NM_001127321	chromobox 5(CBX5)
NM_001127457	cryptochrome circadian clock 2(CRY2)
NM_001127715	syntaxin binding protein 5(STXBP5)
NM_001128429	SWI/SNF-related, matrix-associated actin-dependent regulator of chromatin, subfamily a, containing DEAD/H box 1(SMARCAD1)
NM_001128602	RAS guanyl releasing protein 1(RASGRP1)
NM_001128620	p21 (RAC1) activated kinase 1(PAK1)
NM_001130059	activating transcription factor 7(ATF7)
NM_001130674	calumenin(CALU)
NM_001130701	serine/threonine/tyrosine interacting protein(STYX)
NM_001130831	growth arrest specific 7(GAS7)
NM_001130916	transforming growth factor beta receptor 1(TGFBR1)
NM_001130918	tubulin tyrosine ligase like 6(TTLL6)
NM_001130963	nuclear envelope integral membrane protein 1(NEMP1)
NM_001131005	myocyte enhancer factor 2C(MEF2C)
NM_001131062	SAP30 like(SAP30L)
NM_001134375	cyclin J(CCNJ)
NM_001134400	cytochrome b561 family member D1(CYB561D1)
NM_001134422	CDV3 homolog(CDV3)
NM_001134476	leucine rich repeat containing 8 family member B(LRRC8B)
NM_001134778	PBX homeobox 3(PBX3)
NM_001135095	fibronectin type III domain containing 3B(FNDC3B)
NM_001135099	transmembrane protease, serine 2(TMPRSS2)
NM_001135575	small integral membrane protein 13(SMIM13)
NM_001135773	spermatogenesis associated 2(SPATA2)
NM_001135775	calcium channel flower domain containing 1(CACFD1)
NM_001135805	synaptotagmin 1(SYT1)
NM_001135820	transmembrane protein 2(TMEM2)
NM_001135911	phosphoinositide-3-kinase interacting protein 1(PIK3IP1)
NM_001136000	ABL proto-oncogene 2, non-receptor tyrosine kinase(ABL2)
NM_001136004	microtubule associated monooxygenase, calponin and LIM domain containing 3(MICAL3)
NM_001136049	leishmanolysin like peptidase(LMLN)
NM_001136051	leucine rich repeats and immunoglobulin like domains 3(LRIG3)
NM_001136262	ataxin 7 like 3B(ATXN7L3B)
NM_001136474	vasohibin 2(VASH2)
NM_001136504	synaptotagmin 2(SYT2)
NM_001137675	ataxin 1 like(ATXN1L)
NM_001142275	non imprinted in Prader-Willi/Angelman syndrome 1(NIPA1)
NM_001142333	RNA binding protein, fox-1 homolog 1(RBFOX1)
NM_001142339	G protein subunit alpha L(GNAL)
NM_001142348	sodium voltage-gated channel beta subunit 4(SCN4B)
NM_001142397	cap binding complex dependent translation initiation factor(CTIF)
NM_001142547	RNA pseudouridylate synthase domain containing 3(RPUSD3)
NM_001142568	BBX, HMG-box containing(BBX)
NM_001142597	cleavage and polyadenylation factor I subunit 1(CLP1)
NM_001142885	tropomodulin 2(TMOD2)
NM_001144856	pleckstrin homology and RhoGEF domain containing G6(PLEKHG6)
NM_001144869	lipoyl(octanoyl) transferase 2 (putative)(LIPT2)
NM_001144964	neural precursor cell expressed, developmentally down-regulated 4-like, E3 ubiquitin protein ligase(NEDD4L)
NM_001145028	paralemmin 3(PALM3)
NM_001145118	Grid2 interacting protein(GRID2IP)
NM_001145306	cyclin dependent kinase 6(CDK6)
NM_001145365	zinc finger protein 652(ZNF652)
NM_001145811	SRY-box 6(SOX6)
NM_001146008	solute carrier organic anion transporter family member 5A1(SLCO5A1)
NM_001146099	NIMA related kinase 3(NEK3)
NM_001146335	solute carrier family 6 member 15(SLC6A15)
NM_001151	solute carrier family 25 member 4(SLC25A4)
NM_001159296	Kruppel like factor 8(KLF8)
NM_001159531	brain enriched guanylate kinase associated(BEGAIN)
NM_001159547	BEN domain containing 4(BEND4)
NM_001159673	synaptotagmin binding cytoplasmic RNA interacting protein(SYNCRIP)
NM_001159767	basic leucine zipper and W2 domains 2(BZW2)
NM_001159860	zinc finger protein 583(ZNF583)
NM_001160223	ring finger protein 170(RNF170)
NM_001160300	pannexin 2(PANX2)
NM_001160364	transmembrane channel like 7(TMC7)
NM_001160423	insulin like growth factor 2 mRNA binding protein 1(IGF2BP1)
NM_001163	amyloid beta precursor protein binding family A member 1(APBA1)
NM_001163079	cat eye syndrome chromosome region, candidate 6(CECR6)
NM_001163264	phosphate cytidylyltransferase 1, choline, beta(PCYT1B)
NM_001163446	carboxypeptidase A4(CPA4)
NM_001163636	general transcription factor IIi(GTF2I)
NM_001164271	DLC1 Rho GTPase activating protein(DLC1)
NM_001164277	solute carrier family 37 member 4(SLC37A4)
NM_001164579	chromosome 16 open reading frame 52(C16orf52)
NM_001164665	KIAA1549(KIAA1549)
NM_001165966	PITPNM family member 3(PITPNM3)
NM_001166226	centrosomal protein 120(CEP120)
NM_001166247	glutamate ionotropic receptor kainate type subunit 2(GRIK2)
NM_001166621	trafficking protein particle complex 1(TRAPPC1)
NM_001167830	transmembrane p24 trafficking protein 5(TMED5)
NM_001167856	strawberry notch homolog 1(SBNO1)
NM_001167947	translocase of inner mitochondrial membrane 17 homolog B (yeast)(TIMM17B)
NM_001168271	G protein-coupled receptor 156(GPR156)
NM_001168319	endothelin 1(EDN1)
NM_001168683	taxilin gamma(TXLNG)
NM_001170726	G protein-coupled receptor 137(GPR137)
NM_001170765	ligand dependent nuclear receptor corepressor(LCOR)
NM_001170963	immunoglobulin superfamily member 1(IGSF1)
NM_001171137	spermatid perinuclear RNA binding protein(STRBP)
NM_001172173	cysteine and serine rich nuclear protein 3(CSRNP3)
NM_001172632	oxidized low density lipoprotein receptor 1(OLR1)
NM_001172663	RAB40C, member RAS oncogene family(RAB40C)
NM_001172681	zinc finger protein 641(ZNF641)
NM_001172698	PPARG coactivator 1 beta(PPARGC1B)
NM_001172735	protein phosphatase 1 regulatory subunit 16B(PPP1R16B)
NM_001172766	forkhead box P2(FOXP2)
NM_001174069	LIM homeobox transcription factor 1 alpha(LMX1A)
NM_001174087	nuclear receptor coactivator 3(NCOA3)
NM_001177310	transient receptor potential cation channel subfamily M member 6(TRPM6)
NM_001177381	cytoplasmic polyadenylation element binding protein 2(CPEB2)
NM_001177478	highly divergent homeobox(HDX)
NM_001177591	protein phosphatase 2 regulatory subunit Balpha(PPP2R2A)
NM_001178040	syntaxin 3(STX3)
NM_001178055	poly(ADP-ribose) polymerase family member 8(PARP8)
NM_001178091	branched chain amino acid transaminase 1(BCAT1)
NM_001178137	cytoplasmic polyadenylation element binding protein 3(CPEB3)
NM_001184714	SLAM family member 6(SLAMF6)
NM_001184896	PHD finger protein 8(PHF8)
NM_001185072	claudin 12(CLDN12)
NM_001186	BTB domain and CNC homolog 1(BACH1)
NM_001190266	autophagy related 16 like 1(ATG16L1)
NM_001190440	nuclear receptor corepressor 1(NCOR1)
NM_001190977	YY1 associated factor 2(YAF2)
NM_001191	BCL2 like 1(BCL2L1)
NM_001193321	inhibitor of kappa light polypeptide gene enhancer in B-cells, kinase epsilon(IKBKE)
NM_001194937	pogo transposable element with ZNF domain(POGZ)
NM_001195001	protein tyrosine phosphatase, receptor type U(PTPRU)
NM_001195098	ankyrin repeat domain 28(ANKRD28)
NM_001195278	transmembrane protein 178B(TMEM178B)
NM_001195626	myeloid/lymphoid or mixed-lineage leukemia; translocated to, 10(MLLT10)
NM_001195683	transforming growth factor beta receptor 3(TGFBR3)
NM_001195811	phospholipase D family member 5(PLD5)
NM_001197026	pleckstrin homology domain containing A8(PLEKHA8)
NM_001197294	dihydropyrimidinase like 3(DPYSL3)
NM_001197297	GA binding protein transcription factor alpha subunit(GABPA)
NM_001198	PR/SET domain 1(PRDM1)
NM_001198625	RUNX1 translocation partner 1(RUNX1T1)
NM_001198783	POU class 2 homeobox 1(POU2F1)
NM_001198934	ATP binding cassette subfamily C member 10(ABCC10)
NM_001198978	small ArfGAP2(SMAP2)
NM_001199140	AMMECR1 like(AMMECR1L)
NM_001199260	torsin 1A interacting protein 2(TOR1AIP2)
NM_001199290	PHOSPHO2-KLHL23 readthrough(PHOSPHO2-KLHL23)
NM_001199302	CCR4-NOT transcription complex subunit 2(CNOT2)
NM_001199775	carboxypeptidase D(CPD)
NM_001199880	early growth response 3(EGR3)
NM_001201366	dynein axonemal light chain 1(DNAL1)
NM_001201370	ring finger protein 7(RNF7)
NM_001202485	HSPE1-MOB4 readthrough(HSPE1-MOB4)
NM_001202489	ubiquitin conjugating enzyme E2 G2(UBE2G2)
NM_001202513	MAX dimerization protein 1(MXD1)
NM_001203244	semaphorin 4G(SEMA4G)
NM_001203247	enhancer of zeste 2 polycomb repressive complex 2 subunit(EZH2)
NM_001204103	palmitoyl-protein thioesterase 2(PPT2)
NM_001204171	MDM4, p53 regulator(MDM4)
NM_001204416	regulator of G-protein signaling 6(RGS6)
NM_001204872	aminopeptidase-like 1(NPEPL1)
NM_001204961	PBX homeobox 1(PBX1)
NM_001206	Kruppel like factor 9(KLF9)
NM_001206924	CD86 molecule(CD86)
NM_001207025	POU class 2 homeobox 2(POU2F2)
NM_001207044	cytoplasmic linker associated protein 2(CLASP2)
NM_001207067	basic leucine zipper and W2 domains 1(BZW1)
NM_001220482	Meis homeobox 2(MEIS2)
NM_001241	cyclin T2(CCNT2)
NM_001242409	GRB2 associated regulator of MAPK1 subtype 1(GAREM1)
NM_001242463	F-box protein 32(FBXO32)
NM_001242559	mitogen-activated protein kinase kinase kinase kinase 4(MAP4K4)
NM_001242617	nuclear transport factor 2 like export factor 2(NXT2)
NM_001242628	glucose-fructose oxidoreductase domain containing 1(GFOD1)
NM_001242729	Rho guanine nucleotide exchange factor 38(ARHGEF38)
NM_001242797	zinc finger protein 322(ZNF322)
NM_001273	chromodomain helicase DNA binding protein 4(CHD4)
NM_001283	adaptor related protein complex 1 sigma 1 subunit(AP1S1)
NM_001394	dual specificity phosphatase 4(DUSP4)
NM_001395	dual specificity phosphatase 9(DUSP9)
NM_001396	dual specificity tyrosine phosphorylation regulated kinase 1A(DYRK1A)
NM_001482	glycine amidinotransferase(GATM)
NM_001616	activin A receptor type 2A(ACVR2A)
NM_001626	AKT serine/threonine kinase 2(AKT2)
NM_001661	ADP ribosylation factor like GTPase 4D(ARL4D)
NM_001722	RNA polymerase III subunit D(POLR3D)
NM_001759	cyclin D2(CCND2)
NM_001761	cyclin F(CCNF)
NM_001789	cell division cycle 25A(CDC25A)
NM_001838	C-C motif chemokine receptor 7(CCR7)
NM_001845	collagen type IV alpha 1 chain(COL4A1)
NM_001846	collagen type IV alpha 2 chain(COL4A2)
NM_001853	collagen type IX alpha 3 chain(COL9A3)
NM_001855	collagen type XV alpha 1 chain(COL15A1)
NM_001859	solute carrier family 31 member 1(SLC31A1)
NM_001860	solute carrier family 31 member 2(SLC31A2)
NM_001879	mannan binding lectin serine peptidase 1(MASP1)
NM_001933	dihydrolipoamide S-succinyltransferase(DLST)
NM_001947	dual specificity phosphatase 7(DUSP7)
NM_001973	ELK4, ETS transcription factor(ELK4)
NM_002064	glutaredoxin(GLRX)
NM_002076	glucosamine (N-acetyl)-6-sulfatase(GNS)
NM_002126	HLF, PAR bZIP transcription factor(HLF)
NM_002131	high mobility group AT-hook 1(HMGA1)
NM_002168	isocitrate dehydrogenase (NADP(+)) 2, mitochondrial(IDH2)
NM_002188	interleukin 13(IL13)
NM_002214	integrin subunit beta 8(ITGB8)
NM_002264	karyopherin subunit alpha 1(KPNA1)
NM_002268	karyopherin subunit alpha 4(KPNA4)
NM_002296	lamin B receptor(LBR)
NM_002401	mitogen-activated protein kinase kinase kinase 3(MAP3K3)
NM_002445	macrophage scavenger receptor 1(MSR1)
NM_002506	nerve growth factor(NGF)
NM_002515	NOVA alternative splicing regulator 1(NOVA1)
NM_002524	neuroblastoma RAS viral oncogene homolog(NRAS)
NM_002558	purinergic receptor P2X 1(P2RX1)
NM_002581	pappalysin 1(PAPPA)
NM_002586	PBX homeobox 2(PBX2)
NM_002608	platelet derived growth factor subunit B(PDGFB)
NM_002641	phosphatidylinositol glycan anchor biosynthesis class A(PIGA)
NM_002657	PLAG1 like zinc finger 2(PLAGL2)
NM_002748	mitogen-activated protein kinase 6(MAPK6)
NM_002751	mitogen-activated protein kinase 11(MAPK11)
NM_002752	mitogen-activated protein kinase 9(MAPK9)
NM_002881	RAS like proto-oncogene B(RALB)
NM_002897	RNA binding motif single stranded interacting protein 1(RBMS1)
NM_002898	RNA binding motif single stranded interacting protein 2(RBMS2)
NM_002901	reticulocalbin 1(RCN1)
NM_002906	radixin(RDX)
NM_002928	regulator of G-protein signaling 16(RGS16)
NM_003034	ST8 alpha-N-acetyl-neuraminide alpha-2,8-sialyltransferase 1(ST8SIA1)
NM_003042	solute carrier family 6 member 1(SLC6A1)
NM_003074	SWI/SNF related, matrix associated, actin dependent regulator of chromatin subfamily c member 1(SMARCC1)
NM_003162	striatin(STRN)
NM_003214	TEA domain transcription factor 3(TEAD3)
NM_003246	thrombospondin 1(THBS1)
NM_003251	thyroid hormone responsive(THRSP)
NM_003385	visinin like 1(VSNL1)
NM_003455	zinc finger protein 202(ZNF202)
NM_003458	bassoon presynaptic cytomatrix protein(BSN)
NM_003482	lysine methyltransferase 2D(KMT2D)
NM_003483	high mobility group AT-hook 2(HMGA2)
NM_003498	stannin(SNN)
NM_003566	early endosome antigen 1(EEA1)
NM_003575	zinc finger protein 282(ZNF282)
NM_003583	dual specificity tyrosine phosphorylation regulated kinase 2(DYRK2)
NM_003615	solute carrier family 4 member 7(SLC4A7)
NM_003618	mitogen-activated protein kinase kinase kinase kinase 3(MAP4K3)
NM_003635	N-deacetylase and N-sulfotransferase 2(NDST2)
NM_003640	inhibitor of kappa light polypeptide gene enhancer in B-cells, kinase complex-associated protein(IKBKAP)
NM_003741	chordin(CHRD)
NM_003743	nuclear receptor coactivator 1(NCOA1)
NM_003749	insulin receptor substrate 2(IRS2)
NM_003825	synaptosome associated protein 23(SNAP23)
NM_003831	RIO kinase 3(RIOK3)
NM_003927	methyl-CpG binding domain protein 2(MBD2)
NM_003941	Wiskott-Aldrich syndrome like(WASL)
NM_003958	ring finger protein 8(RNF8)
NM_003999	oncostatin M receptor(OSMR)
NM_004091	E2F transcription factor 2(E2F2)
NM_004112	fibroblast growth factor 11(FGF11)
NM_004178	TARBP2, RISC loading complex RNA binding subunit(TARBP2)
NM_004186	semaphorin 3F(SEMA3F)
NM_004200	synaptotagmin 7(SYT7)
NM_004227	cytohesin 3(CYTH3)
NM_004263	ssemaphorin 4F(SEMA4F)
NM_004273	carbohydrate sulfotransferase 3(CHST3)
NM_004274	A-kinase anchoring protein 6(AKAP6)
NM_004277	solute carrier family 25 member 27(SLC25A27)
NM_004302	activin A receptor type 1B(ACVR1B)
NM_004346	caspase 3(CASP3)
NM_004359	cell division cycle 34(CDC34)
NM_004417	dual specificity phosphatase 1(DUSP1)
NM_004423	dishevelled segment polarity protein 3(DVL3)
NM_004438	EPH receptor A4(EPHA4)
NM_004464	fibroblast growth factor 5(FGF5)
NM_004481	polypeptide N-acetylgalactosaminyltransferase 2(GALNT2)
NM_004505	ubiquitin specific peptidase 6(USP6)
NM_004537	nucleosome assembly protein 1 like 1(NAP1L1)
NM_004558	neurturin(NRTN)
NM_004586	ribosomal protein S6 kinase A3(RPS6KA3)
NM_004645	coilin(COIL)
NM_004700	potassium voltage-gated channel subfamily Q member 4(KCNQ4)
NM_004756	NUMB like, endocytic adaptor protein(NUMBL)
NM_004784	N-deacetylase and N-sulfotransferase 3(NDST3)
NM_004821	heart and neural crest derivatives expressed 1(HAND1)
NM_004822	netrin 1(NTN1)
NM_004852	one cut homeobox 2(ONECUT2)
NM_004884	immunoglobulin superfamily DCC subclass member 3(IGDCC3)
NM_004922	SEC24 homolog C, COPII coat complex component(SEC24C)
NM_004938	death associated protein kinase 1(DAPK1)
NM_004947	dedicator of cytokinesis 3(DOCK3)
NM_004976	potassium voltage-gated channel subfamily C member 1(KCNC1)
NM_005009	NME/NM23 nucleoside diphosphate kinase 4(NME4)
NM_005051	glutaminyl-tRNA synthetase(QARS)
NM_005063	stearoyl-CoA desaturase(SCD)
NM_005187	CBFA2/RUNX1 translocation partner 3(CBFA2T3)
NM_005188	Cbl proto-oncogene(CBL)
NM_005189	chromobox 2(CBX2)
NM_005195	CCAAT/enhancer binding protein delta(CEBPD)
NM_005224	AT-rich interaction domain 3A(ARID3A)
NM_005233	EPH receptor A3(EPHA3)
NM_005236	ERCC excision repair 4, endonuclease catalytic subunit(ERCC4)
NM_005274	G protein subunit gamma 5(GNG5)
NM_005328	hyaluronan synthase 2(HAS2)
NM_005336	high density lipoprotein binding protein(HDLBP)
NM_005378	v-myc avian myelocytomatosis viral oncogene neuroblastoma derived homolog(MYCN)
NM_005387	nucleoporin 98(NUP98)
NM_005399	protein kinase AMP-activated non-catalytic subunit beta 2(PRKAB2)
NM_005415	solute carrier family 20 member 1(SLC20A1)
NM_005430	Wnt family member 1(WNT1)
NM_005458	gamma-aminobutyric acid type B receptor subunit 2(GABBR2)
NM_005466	mediator complex subunit 6(MED6)
NM_005475	SH2B adaptor protein 3(SH2B3)
NM_005539	inositol polyphosphate-5-phosphatase A(INPP5A)
NM_005569	LIM domain kinase 2(LIMK2)
NM_005586	MyoD family inhibitor(MDFI)
NM_005649	zinc finger protein 354A(ZNF354A)
NM_005686	SRY-box 13(SOX13)
NM_005688	ATP binding cassette subfamily C member 5(ABCC5)
NM_005700	dipeptidyl peptidase 3(DPP3)
NM_005716	GIPC PDZ domain containing family member 1(GIPC1)
NM_005725	tetraspanin 2(TSPAN2)
NM_005761	plexin C1(PLXNC1)
NM_005763	aminoadipate-semialdehyde synthase(AASS)
NM_005766	FERM, ARH/RhoGEF and pleckstrin domain protein 1(FARP1)
NM_005793	NME/NM23 nucleoside diphosphate kinase 6(NME6)
NM_005876	SPEG complex locus(SPEG)
NM_005880	DnaJ heat shock protein family (Hsp40) member A2(DNAJA2)
NM_005920	myocyte enhancer factor 2D(MEF2D)
NM_005921	mitogen-activated protein kinase kinase kinase 1(MAP3K1)
NM_005940	matrix metallopeptidase 11(MMP11)
NM_006051	amyloid beta precursor protein binding family B member 3(APBB3)
NM_006133	diacylglycerol lipase alpha(DAGLA)
NM_006252	protein kinase AMP-activated catalytic subunit alpha 2(PRKAA2)
NM_006267	RAN binding protein 2(RANBP2)
NM_006268	double PHD fingers 2(DPF2)
NM_006290	TNF alpha induced protein 3(TNFAIP3)
NM_006315	polycomb group ring finger 3(PCGF3)
NM_006380	amyloid beta precursor protein binding protein 2(APPBP2)
NM_006465	AT-rich interaction domain 3B(ARID3B)
NM_006547	insulin like growth factor 2 mRNA binding protein 3(IGF2BP3)
NM_006609	mitogen-activated protein kinase kinase kinase 2(MAP3K2)
NM_006628	cAMP regulated phosphoprotein 19(ARPP19)
NM_006667	progesterone receptor membrane component 1(PGRMC1)
NM_006668	cytochrome P450 family 46 subfamily A member 1(CYP46A1)
NM_006713	SUB1 homolog, transcriptional regulator(SUB1)
NM_006763	BTG anti-proliferation factor 2(BTG2)
NM_006876	beta-1,4-glucuronyltransferase 1(B4GAT1)
NM_006888	calmodulin 1(CALM1)
NM_006902	paired related homeobox 1(PRRX1)
NM_006913	ring finger protein 5(RNF5)
NM_006965	zinc finger protein 24(ZNF24)
NM_007001	solute carrier family 35 member D2(SLC35D2)
NM_007018	centriolin(CNTRL)
NM_007037	ADAM metallopeptidase with thrombospondin type 1 motif 8(ADAMTS8)
NM_007038	ADAM metallopeptidase with thrombospondin type 1 motif 5(ADAMTS5)
NM_007124	utrophin(UTRN)
NM_007275	tumor suppressor candidate 2(TUSC2)
NM_007361	nidogen 2(NID2)
NM_007371	bromodomain containing 3(BRD3)
NM_012098	angiopoietin like 2(ANGPTL2)
NM_012193	frizzled class receptor 4(FZD4)
NM_012199	argonaute 1, RISC catalytic component(AGO1)
NM_012200	beta-1,3-glucuronyltransferase 3(B3GAT3)
NM_012214	mannosyl (alpha-1,3-)-glycoprotein beta-1,4-N-acetylglucosaminyltransferase, isozyme A(MGAT4A)
NM_012291	extra spindle pole bodies like 1, separase(ESPL1)
NM_012293	peroxidasin(PXDN)
NM_012320	phospholipase A2 group XV(PLA2G15)
NM_012328	DnaJ heat shock protein family (Hsp40) member B9(DNAJB9)
NM_012333	MYC binding protein(MYCBP)
NM_012335	myosin IF(MYO1F)
NM_012388	biogenesis of lysosomal organelles complex 1 subunit 6(BLOC1S6)
NM_012414	RAB3 GTPase activating non-catalytic protein subunit 2(RAB3GAP2)
NM_013261	PPARG coactivator 1 alpha(PPARGC1A)
NM_013302	eukaryotic elongation factor 2 kinase(EEF2K)
NM_013309	solute carrier family 30 member 4(SLC30A4)
NM_013320	host cell factor C2(HCFC2)
NM_013325	autophagy related 4B cysteine peptidase(ATG4B)
NM_013381	thyrotropin releasing hormone degrading enzyme(TRHDE)
NM_013386	solute carrier family 25 member 24(SLC25A24)
NM_014023	WD repeat domain 37(WDR37)
NM_014069	psoriasis susceptibility 1 candidate 2(PSORS1C2)
NM_014139	sodium voltage-gated channel alpha subunit 11(SCN11A)
NM_014212	homeobox C11(HOXC11)
NM_014240	LIM domains containing 1(LIMD1)
NM_014282	hyaluronan binding protein 4(HABP4)
NM_014305	TDP-glucose 4,6-dehydratase(TGDS)
NM_014311	single-strand-selective monofunctional uracil-DNA glycosylase 1(SMUG1)
NM_014405	calcium voltage-gated channel auxiliary subunit gamma 4(CACNG4)
NM_014431	phosphatase domain containing, paladin 1(PALD1)
NM_014584	endoplasmic reticulum oxidoreductase 1 alpha(ERO1A)
NM_014598	suppressor of cytokine signaling 7(SOCS7)
NM_014607	UBX domain protein 4(UBXN4)
NM_014636	Ral GEF with PH domain and SH3 binding motif 1(RALGPS1)
NM_014640	tubulin tyrosine ligase like 4(TTLL4)
NM_014643	zinc finger protein 516(ZNF516)
NM_014668	growth regulation by estrogen in breast cancer 1(GREB1)
NM_014683	unc-51 like autophagy activating kinase 2(ULK2)
NM_014692	SEC14 like lipid binding 5(SEC14L5)
NM_014726	TBK1 binding protein 1(TBKBP1)
NM_014747	regulating synaptic membrane exocytosis 3(RIMS3)
NM_014779	TSC22 domain family member 2(TSC22D2)
NM_014813	leucine rich repeats and immunoglobulin like domains 2(LRIG2)
NM_014830	zinc finger and BTB domain containing 39(ZBTB39)
NM_014831	tetratricopeptide repeat and ankyrin repeat containing 1(TRANK1)
NM_014844	tectonin beta-propeller repeat containing 2(TECPR2)
NM_014872	zinc finger and BTB domain containing 5(ZBTB5)
NM_014873	lysophosphatidylglycerol acyltransferase 1(LPGAT1)
NM_014877	helicase with zinc finger(HELZ)
NM_014901	ring finger protein 44(RNF44)
NM_014911	AP2 associated kinase 1(AAK1)
NM_014934	DAZ interacting zinc finger protein 1(DZIP1)
NM_014938	MLX interacting protein(MLXIP)
NM_014952	bromo adjacent homology domain containing 1(BAHD1)
NM_014956	centrosomal protein 164(CEP164)
NM_014961	RUN and FYVE domain containing 3(RUFY3)
NM_014962	BTB domain containing 3(BTBD3)
NM_015026	MON2 homolog, regulator of endosome-to-Golgi trafficking(MON2)
NM_015056	ribosomal RNA processing 1B(RRP1B)
NM_015063	solute carrier family 8 member A2(SLC8A2)
NM_015086	dendrin(DDN)
NM_015093	TGF-beta activated kinase 1/MAP3K7 binding protein 2(TAB2)
NM_015094	HIC ZBTB transcriptional repressor 2(HIC2)
NM_015103	plexin D1(PLXND1)
NM_015117	zinc finger CCCH-type containing 3(ZC3H3)
NM_015123	FERM domain containing 4B(FRMD4B)
NM_015177	deltex E3 ubiquitin ligase 4(DTX4)
NM_015299	KH and NYN domain containing(KHNYN)
NM_015306	ubiquitin specific peptidase 24(USP24)
NM_015307	family with sequence similarity 189 member A1(FAM189A1)
NM_015344	leptin receptor overlapping transcript-like 1(LEPROTL1)
NM_015346	zinc finger FYVE-type containing 26(ZFYVE26)
NM_015393	prostate androgen-regulated mucin-like protein 1(PARM1)
NM_015396	armadillo repeat containing 8(ARMC8)
NM_015446	AT-hook containing transcription factor 1(AHCTF1)
NM_015460	myosin VIIA and Rab interacting protein(MYRIP)
NM_015482	solute carrier family 22 member 23(SLC22A23)
NM_015488	paroxysmal nonkinesigenic dyskinesia(PNKD)
NM_015492	chromosome 15 open reading frame 39(C15orf39)
NM_015541	leucine rich repeats and immunoglobulin like domains 1(LRIG1)
NM_015550	oxysterol binding protein like 3(OSBPL3)
NM_015565	listerin E3 ubiquitin protein ligase 1(LTN1)
NM_015715	phospholipase A2 group III(PLA2G3)
NM_015884	membrane bound transcription factor peptidase, site 2(MBTPS2)
NM_015888	hook microtubule tethering protein 1(HOOK1)
NM_015975	TATA-box binding protein associated factor 9b(TAF9B)
NM_016072	golgi transport 1B(GOLT1B)
NM_016174	cerebral endothelial cell adhesion molecule(CERCAM)
NM_016206	vestigial like family member 3(VGLL3)
NM_016231	nemo like kinase(NLK)
NM_016247	interphotoreceptor matrix proteoglycan 2(IMPG2)
NM_016272	transducer of ERBB2, 2(TOB2)
NM_016274	pleckstrin homology domain containing O1(PLEKHO1)
NM_016376	ankyrin repeat and FYVE domain containing 1(ANKFY1)
NM_016424	LUC7 like 3 pre-mRNA splicing factor(LUC7L3)
NM_016530	RAB8B, member RAS oncogene family(RAB8B)
NM_016591	glucosaminyl (N-acetyl) transferase 4, core 2(GCNT4)
NM_016620	zinc finger protein 644(ZNF644)
NM_017412	frizzled class receptor 3(FZD3)
NM_017495	RNA binding motif protein 38(RBM38)
NM_017564	stabilin 2(STAB2)
NM_017596	kinesin family member 21B(KIF21B)
NM_017629	argonaute 4, RISC catalytic component(AGO4)
NM_017637	basonuclin 2(BNC2)
NM_017644	kelch like family member 24(KLHL24)
NM_017686	ganglioside induced differentiation associated protein 2(GDAP2)
NM_017703	F-box and leucine rich repeat protein 12(FBXL12)
NM_017704	ankyrin repeat domain 49(ANKRD49)
NM_017754	UHRF1 binding protein 1(UHRF1BP1)
NM_017759	INO80 complex subunit D(INO80D)
NM_017780	chromodomain helicase DNA binding protein 7(CHD7)
NM_017789	semaphorin 4C(SEMA4C)
NM_017902	hypoxia inducible factor 1 alpha subunit inhibitor(HIF1AN)
NM_017919	syntaxin 17(STX17)
NM_017944	ubiquitin specific peptidase 47(USP47)
NM_017990	pyruvate dehydrogenase phosphatase regulatory subunit(PDPR)
NM_018053	XK related 8(XKR8)
NM_018061	pre-mRNA processing factor 38B(PRPF38B)
NM_018086	fidgetin, microtubule severing factor(FIGN)
NM_018121	SMC5-SMC6 complex localization factor 2(SLF2)
NM_018205	leucine rich repeat containing 20(LRRC20)
NM_018208	ethanolamine kinase 2(ETNK2)
NM_018332	DEAD-box helicase 19A(DDX19A)
NM_018351	FYVE, RhoGEF and PH domain containing 6(FGD6)
NM_018373	synaptojanin 2 binding protein(SYNJ2BP)
NM_018440	phosphoprotein membrane anchor with glycosphingolipid microdomains 1(PAG1)
NM_018490	leucine rich repeat containing G protein-coupled receptor 4(LGR4)
NM_018566	YOD1 deubiquitinase(YOD1)
NM_018638	ethanolamine kinase 1(ETNK1)
NM_018644	beta-1,3-glucuronyltransferase 1(B3GAT1)
NM_018688	bridging integrator 3(BIN3)
NM_018984	slingshot protein phosphatase 1(SSH1)
NM_019008	mitochondrial elongation factor 1(MIEF1)
NM_019044	coiled-coil domain containing 93(CCDC93)
NM_019060	cysteine rich C-terminal 1(CRCT1)
NM_019116	ubiquitin family domain containing 1(UBFD1)
NM_019592	ring finger protein 20(RNF20)
NM_019593	glycerophosphocholine phosphodiesterase 1(GPCPD1)
NM_019624	ATP binding cassette subfamily B member 9(ABCB9)
NM_020120	UDP-glucose glycoprotein glucosyltransferase 1(UGGT1)
NM_020122	potassium channel modulatory factor 1(KCMF1)
NM_020156	core 1 synthase, glycoprotein-N-acetylgalactosamine 3-beta-galactosyltransferase 1(C1GALT1)
NM_020246	solute carrier family 12 member 9(SLC12A9)
NM_020310	MAX network transcriptional repressor(MNT)
NM_020335	VANGL planar cell polarity protein 2(VANGL2)
NM_020354	ectonucleoside triphosphate diphosphohydrolase 7(ENTPD7)
NM_020371	apoptosis and caspase activation inhibitor(AVEN)
NM_020423	SCY1 like pseudokinase 3(SCYL3)
NM_020474	polypeptide N-acetylgalactosaminyltransferase 1(GALNT1)
NM_020713	zinc finger protein 512B(ZNF512B)
NM_020715	pleckstrin homology, MyTH4 and FERM domain containing H1(PLEKHH1)
NM_020748	integrator complex subunit 2(INTS2)
NM_020762	SLIT-ROBO Rho GTPase activating protein 1(SRGAP1)
NM_020764	CASK interacting protein 1(CASKIN1)
NM_020769	retrotransposon gag domain containing 1(RGAG1)
NM_020774	mindbomb E3 ubiquitin protein ligase 1(MIB1)
NM_020786	pyruvate dehyrogenase phosphatase catalytic subunit 2(PDP2)
NM_020791	TAO kinase 1(TAOK1)
NM_020809	Rho GTPase activating protein 20(ARHGAP20)
NM_020883	zinc finger SWIM-type containing 5(ZSWIM5)
NM_020911	plexin A4(PLXNA4)
NM_020949	solute carrier family 7 member 14(SLC7A14)
NM_020962	immunoglobulin superfamily DCC subclass member 4(IGDCC4)
NM_020971	spectrin beta, non-erythrocytic 4(SPTBN4)
NM_021083	X-linked Kx blood group(XK)
NM_021095	solute carrier family 5 member 6(SLC5A6)
NM_021110	collagen type XIV alpha 1 chain(COL14A1)
NM_021127	phorbol-12-myristate-13-acetate-induced protein 1(PMAIP1)
NM_021214	abhydrolase domain containing 17C(ABHD17C)
NM_021244	Ras related GTP binding D(RRAGD)
NM_021248	cadherin 22(CDH22)
NM_021249	sorting nexin 6(SNX6)
NM_021627	SUMO1/sentrin/SMT3 specific peptidase 2(SENP2)
NM_021643	tribbles pseudokinase 2(TRIB2)
NM_021928	signal peptidase complex subunit 3(SPCS3)
NM_022037	TIA1 cytotoxic granule associated RNA binding protein(TIA1)
NM_022041	gigaxonin(GAN)
NM_022119	protease, serine 22(PRSS22)
NM_022133	sorting nexin 16(SNX16)
NM_022166	xylosyltransferase 1(XYLT1)
NM_022365	DnaJ heat shock protein family (Hsp40) member C1(DNAJC1)
NM_022455	nuclear receptor binding SET domain protein 1(NSD1)
NM_022462	hypoxia inducible factor 3 alpha subunit(HIF3A)
NM_022566	mesoderm development candidate 1(MESDC1)
NM_022726	ELOVL fatty acid elongase 4(ELOVL4)
NM_022749	family with sequence similarity 160 member B2(FAM160B2)
NM_022767	apoptosis enhancing nuclease(AEN)
NM_022781	ring finger protein 38(RNF38)
NM_023072	zinc finger SWIM-type containing 4(ZSWIM4)
NM_024036	leucine rich repeat and fibronectin type III domain containing 4(LRFN4)
NM_024312	N-acetylglucosamine-1-phosphate transferase alpha and beta subunits(GNPTAB)
NM_024329	EF-hand domain family member D2(EFHD2)
NM_024501	homeobox D1(HOXD1)
NM_024551	adiponectin receptor 2(ADIPOR2)
NM_024592	steroid 5 alpha-reductase 3(SRD5A3)
NM_024674	lin-28 homolog A(LIN28A)
NM_024681	potassium channel tetramerization domain containing 17(KCTD17)
NM_024713	katanin regulatory subunit B1 like 1(KATNBL1)
NM_024837	ATPase phospholipid transporting 8B4 (putative)(ATP8B4)
NM_024852	argonaute 3, RISC catalytic component(AGO3)
NM_024913	cadherin like and PC-esterase domain containing 1(CPED1)
NM_025009	centrosomal protein 135(CEP135)
NM_025014	Rho guanine nucleotide exchange factor 15(ARHGEF15)
NM_025054	valosin containing protein interacting protein 1(VCPIP1)
NM_025074	Fraser extracellular matrix complex subunit 1(FRAS1)
NM_025081	NYN domain and retroviral integrase containing(NYNRIN)
NM_025134	chromodomain helicase DNA binding protein 9(CHD9)
NM_025182	family with sequence similarity 214 member B(FAM214B)
NM_025191	ER degradation enhancing alpha-mannosidase like protein 3(EDEM3)
NM_025195	tribbles pseudokinase 1(TRIB1)
NM_025204	TraB domain containing(TRABD)
NM_030576	LIM domain containing 2(LIMD2)
NM_030627	cytoplasmic polyadenylation element binding protein 4(CPEB4)
NM_030640	dual specificity phosphatase 16(DUSP16)
NM_030915	limb bud and heart development(LBH)
NM_031481	solute carrier family 25 member 18(SLC25A18)
NM_032016	STARD3 N-terminal like(STARD3NL)
NM_032017	serine/threonine kinase 40(STK40)
NM_032211	lysyl oxidase like 4(LOXL4)
NM_032341	DNA damage inducible 1 homolog 2(DDI2)
NM_032482	DOT1 like histone lysine methyltransferase(DOT1L)
NM_032511	failed axon connections homolog(FAXC)
NM_032521	par-6 family cell polarity regulator beta(PARD6B)
NM_032557	ubiquitin specific peptidase 38(USP38)
NM_032582	ubiquitin specific peptidase 32(USP32)
NM_032603	lysyl oxidase like 3(LOXL3)
NM_032808	leucine rich repeat and Ig domain containing 1(LINGO1)
NM_032833	protein phosphatase 1 regulatory subunit 15B(PPP1R15B)
NM_032866	cingulin like 1(CGNL1)
NM_032932	RAB11 family interacting protein 4(RAB11FIP4)
NM_032947	small integral membrane protein 3(SMIM3)
NM_033089	zinc finger CCHC-type containing 3(ZCCHC3)
NM_033119	naked cuticle homolog 1(NKD1)
NM_033129	scratch family transcriptional repressor 2(SCRT2)
NM_033161	surfeit 4(SURF4)
NM_033224	purine rich element binding protein B(PURB)
NM_033315	RAS like family 10 member B(RASL10B)
NM_033446	multivesicular body subunit 12B(MVB12B)
NM_033549	tripartite motif containing 41(TRIM41)
NM_052851	StAR related lipid transfer domain containing 13(STARD13)
NM_052875	VPS26, retromer complex component B(VPS26B)
NM_053046	egl-9 family hypoxia inducible factor 2(EGLN2)
NM_053056	cyclin D1(CCND1)
NM_054110	polypeptide N-acetylgalactosaminyltransferase 15(GALNT15)
NM_080616	nucleolar protein 4 like(NOL4L)
NM_080652	transmembrane protein 41A(TMEM41A)
NM_080722	ADAM metallopeptidase with thrombospondin type 1 motif 14(ADAMTS14)
NM_080867	suppressor of cytokine signaling 4(SOCS4)
NM_130446	kelch like family member 6(KLHL6)
NM_130783	tetraspanin 18(TSPAN18)
NM_133369	unc-5 netrin receptor A(UNC5A)
NM_133445	glutamate ionotropic receptor NMDA type subunit 3A(GRIN3A)
NM_138300	pygopus family PHD finger 2(PYGO2)
NM_138353	DDB1 and CUL4 associated factor 15(DCAF15)
NM_138396	membrane associated ring-CH-type finger 9(MARCH9)
NM_138447	zinc finger protein 689(ZNF689)
NM_138471	chromosome 11 open reading frame 84(C11orf84)
NM_138806	CD200 receptor 1(CD200R1)
NM_139055	ADAM metallopeptidase with thrombospondin type 1 motif 15(ADAMTS15)
NM_139248	lipase H(LIPH)
NM_139283	PTC7 protein phosphatase homolog(PPTC7)
NM_144571	CCR4-NOT transcription complex subunit 6 like(CNOT6L)
NM_144582	testis expressed 261(TEX261)
NM_144711	kelch like family member 23(KLHL23)
NM_144991	thrombospondin type laminin G domain and EAR repeats(TSPEAR)
NM_145012	cyclin Y(CCNY)
NM_145176	solute carrier family 2 member 12(SLC2A12)
NM_145236	UDP-GlcNAc:betaGal beta-1,3-N-acetylglucosaminyltransferase 7(B3GNT7)
NM_145808	myotrophin(MTPN)
NM_152280	synaptotagmin 11(SYT11)
NM_152305	protein O-glucosyltransferase 1(POGLUT1)
NM_152407	GrpE like 2, mitochondrial(GRPEL2)
NM_152470	ring finger protein 165(RNF165)
NM_152493	zinc finger protein 362(ZNF362)
NM_152527	solute carrier family 16 member 14(SLC16A14)
NM_152556	base methyltransferase of 25S rRNA 2 homolog(BMT2)
NM_152699	SUMO1/sentrin specific peptidase 5(SENP5)
NM_152739	homeobox A9(HOXA9)
NM_152744	sidekick cell adhesion molecule 1(SDK1)
NM_152753	signal peptide, CUB domain and EGF like domain containing 3(SCUBE3)
NM_152756	RPTOR independent companion of MTOR complex 2(RICTOR)
NM_152758	YTH N6-methyladenosine RNA binding protein 3(YTHDF3)
NM_152890	collagen type XXIV alpha 1 chain(COL24A1)
NM_152896	ubiquitin like with PHD and ring finger domains 2(UHRF2)
NM_153240	nephrocystin 3(NPHP3)
NM_153252	bromodomain and WD repeat domain containing 3(BRWD3)
NM_153340	ataxin 7 like 2(ATXN7L2)
NM_153442	G protein-coupled receptor 26(GPR26)
NM_153686	ligand dependent nuclear receptor corepressor like(LCORL)
NM_153690	family with sequence similarity 43 member A(FAM43A)
NM_153712	tubulin tyrosine ligase(TTL)
NM_170665	ATPase sarcoplasmic/endoplasmic reticulum Ca2+ transporting 2(ATP2A2)
NM_172037	retinol dehydrogenase 10 (all-trans)(RDH10)
NM_173475	defective in cullin neddylation 1 domain containing 3(DCUN1D3)
NM_173491	LSM11, U7 small nuclear RNA associated(LSM11)
NM_173514	solute carrier family 38 member 9(SLC38A9)
NM_173546	kelch domain containing 8B(KLHDC8B)
NM_173560	regulatory factor X6(RFX6)
NM_173566	proline rich 14 like(PRR14L)
NM_173569	ubinuclein 2(UBN2)
NM_173582	phosphoglucomutase 2 like 1(PGM2L1)
NM_173595	ankyrin repeat domain 52(ANKRD52)
NM_173648	coiled-coil domain containing 141(CCDC141)
NM_173653	solute carrier family 9 member A9(SLC9A9)
NM_173654	EGF domain specific O-linked N-acetylglucosamine transferase(EOGT)
NM_173689	crumbs 2, cell polarity complex component(CRB2)
NM_173814	protogenin(PRTG)
NM_173829	SREK1 interacting protein 1(SREK1IP1)
NM_174911	family with sequence similarity 84 member B(FAM84B)
NM_175056	zona pellucida like domain containing 1(ZPLD1)
NM_175852	taxilin alpha(TXLNA)
NM_175856	chondroitin sulfate synthase 3(CHSY3)
NM_175873	sosondowah ankyrin repeat domain family member A(SOWAHA)
NM_175884	coiled-coil domain containing 71-like(CCDC71L)
NM_175921	chromosome 5 open reading frame 51(C5orf51)
NM_175922	proline rich 18(PRR18)
NM_176819	chromosome X open reading frame 36(CXorf36)
NM_177966	phosphodiesterase 12(PDE12)
NM_178123	SEC14 and spectrin domain containing 1(SESTD1)
NM_178310	snail family transcriptional repressor 3(SNAI3)
NM_178557	N-acetyltransferase 8 like(NAT8L)
NM_178565	R-spondin 2(RSPO2)
NM_178812	metadherin(MTDH)
NM_178819	glycerol-3-phosphate acyltransferase 4(GPAT4)
NM_181644	major facilitator superfamily domain containing 4A(MFSD4A)
NM_181783	transmembrane and tetratricopeptide repeat containing 3(TMTC3)
NM_182488	ubiquitin specific peptidase 12(USP12)
NM_182540	integrator complex subunit 6 like(INTS6L)
NM_182569	glycerophosphodiester phosphodiesterase domain containing 1(GDPD1)
NM_182700	Sp8 transcription factor(SP8)
NM_183376	arrestin domain containing 4(ARRDC4)
NM_183416	kinesin family member 1B(KIF1B)
NM_194291	transmembrane protein 65(TMEM65)
NM_194298	solute carrier family 16 member 9(SLC16A9)
NM_198256	E2F transcription factor 6(E2F6)
NM_198465	Nik related kinase(NRK)
NM_198514	NHL repeat containing 2(NHLRC2)
NM_198526	zinc finger protein 710(ZNF710)
NM_198563	transmembrane protein 110(TMEM110)
NM_198686	RAB15, member RAS oncogene family(RAB15)
NM_198963	DExH-box helicase 57(DHX57)
NM_201542	mediator complex subunit 8(MED8)
NM_203453	phospholipid phosphatase 6(PLPP6)
NM_207344	SPRY domain containing 4(SPRYD4)
NM_207361	FRAS1 related extracellular matrix protein 2(FREM2)
NM_207371	SKI/DACH domain containing 1(SKIDA1)
NM_144993
Figure 3–Table Supplement 2. Conserved mRNA targets of miR-125 between humans & mice.
RefSeq_ID	Gene Name
NM_000038	APC, WNT signaling pathway regulator(APC)
NM_000116	tafazzin(TAZ)
NM_000124	ERCC excision repair 6, chromatin remodeling factor(ERCC6)
NM_000141	fibroblast growth factor receptor 2(FGFR2)
NM_000148	fucosyltransferase 1 (H blood group)(FUT1)
NM_000212	integrin subunit beta 3(ITGB3)
NM_000217	potassium voltage-gated channel subfamily A member 1(KCNA1)
NM_000330	retinoschisin 1(RS1)
NM_000332	ataxin 1(ATXN1)
NM_000335	sodium voltage-gated channel alpha subunit 5(SCN5A)
NM_000376	vitamin D (1,25- dihydroxyvitamin D3) receptor(VDR)
NM_000430	platelet activating factor acetylhydrolase 1b regulatory subunit 1(PAFAH1B1)
NM_000434	neuraminidase 1(NEU1)
NM_000449	regulatory factor X5(RFX5)
NM_000514	glial cell derived neurotrophic factor(GDNF)
NM_000565	interleukin 6 receptor(IL6R)
NM_000718	calcium voltage-gated channel subunit alpha1 B(CACNA1B)
NM_000723	calcium voltage-gated channel auxiliary subunit beta 1(CACNB1)
NM_000782	cytochrome P450 family 24 subfamily A member 1(CYP24A1)
NM_000799	erythropoietin(EPO)
NM_000833	glutamate ionotropic receptor NMDA type subunit 2A(GRIN2A)
NM_001001330	receptor accessory protein 3(REEP3)
NM_001001344	ATPase plasma membrane Ca2+ transporting 3(ATP2B3)
NM_001001481	ubiquitin conjugating enzyme E2 W (putative)(UBE2W)
NM_001001549	growth factor receptor bound protein 10(GRB10)
NM_001001924	microtubule associated tumor suppressor 1(MTUS1)
NM_001002031	ATP synthase, H+ transporting, mitochondrial Fo complex subunit C2 (subunit 9)(ATP5G2)
NM_001002257	lysocardiolipin acyltransferase 1(LCLAT1)
NM_001002909	G-patch domain containing 8(GPATCH8)
NM_001003694	bromodomain and PHD finger containing 1(BRPF1)
NM_001003698	ras responsive element binding protein 1(RREB1)
NM_001003891	mediator complex subunit 15(MED15)
NM_001003940	Bcl2 modifying factor(BMF)
NM_001004317	lin-28 homolog B(LIN28B)
NM_001005209	transmembrane protein 198(TMEM198)
NM_001005502	carboxypeptidase M(CPM)
NM_001006115	inositol hexakisphosphate kinase 1(IP6K1)
NM_001006665	ribosomal protein S6 kinase A1(RPS6KA1)
NM_001008222	zinc finger DHHC-type containing 9(ZDHHC9)
NM_001008709	protein phosphatase 1 catalytic subunit alpha(PPP1CA)
NM_001009185	acyl-CoA synthetase long-chain family member 6(ACSL6)
NM_001010848	neuregulin 3(NRG3)
NM_001010887	alkaline ceramidase 2(ACER2)
NM_001010898	solute carrier family 6 member 17(SLC6A17)
NM_001011663	polycomb group ring finger 6(PCGF6)
NM_001012241	male specific lethal 1 homolog(MSL1)
NM_001012301	arylsulfatase family member I(ARSI)
NM_001012755	solute carrier family 25 member 53(SLC25A53)
NM_001012991	lysine rich nucleolar protein 1(KNOP1)
NM_001017408	golgi associated PDZ and coiled-coil motif containing(GOPC)
NM_001018111	podocalyxin like(PODXL)
NM_001024858	spectrin beta, erythrocytic(SPTB)
NM_001025356	anoctamin 6(ANO6)
NM_001025366	vascular endothelial growth factor A(VEGFA)
NM_001029859	potassium channel tetramerization domain containing 21(KCTD21)
NM_001031679	methionine sulfoxide reductase B3(MSRB3)
NM_001031690	family with sequence similarity 131 member B(FAM131B)
NM_001031804	MAF bZIP transcription factor(MAF)
NM_001033602	microtubule associated tumor suppressor candidate 2(MTUS2)
NM_001033723	zinc finger protein 704(ZNF704)
NM_001034914	potassium voltage-gated channel interacting protein 3(KCNIP3)
NM_001035534	family with sequence similarity 129 member B(FAM129B)
NM_001037442	RUN and FYVE domain containing 3(RUFY3)
NM_001037806	NCK associated protein 5 like(NCKAP5L)
NM_001037814	GRB2 associated binding protein family member 4(GAB4)
NM_001038707	CDC42 small effector 1(CDC42SE1)
NM_001039111	tripartite motif containing 71(TRIM71)
NM_001039469	microtubule affinity regulating kinase 2(MARK2)
NM_001039479	apoptosis resistant E3 ubiquitin protein ligase 1(AREL1)
NM_001039690	chromosome transmission fidelity factor 8(CHTF8)
NM_001040167	LFNG O-fucosylpeptide 3-beta-N-acetylglucosaminyltransferase(LFNG)
NM_001042371	phosphoglycolate phosphatase(PGP)
NM_001042519	chromosome 2 open reading frame 88(C2orf88)
NM_001042599	erb-b2 receptor tyrosine kinase 4(ERBB4)
NM_001043318	ELM2 and Myb/SANT domain containing 1(ELMSAN1)
NM_001051	somatostatin receptor 3(SSTR3)
NM_001066	TNF receptor superfamily member 1B(TNFRSF1B)
NM_001076785	solute carrier family 7 member 6(SLC7A6)
NM_001077261	nuclear receptor corepressor 2(NCOR2)
NM_001077263	transmembrane protease, serine 13(TMPRSS13)
NM_001079514	ubinuclein 1(UBN1)
NM_001079537	trafficking protein particle complex 6B(TRAPPC6B)
NM_001079559	heterogeneous nuclear ribonucleoprotein U like 2(HNRNPUL2)
NM_001080383	gap junction protein gamma 1(GJC1)
NM_001080412	zinc finger and BTB domain containing 38(ZBTB38)
NM_001080429	calmodulin regulated spectrin associated protein family member 3(CAMSAP3)
NM_001080475	pleckstrin homology domain containing M3(PLEKHM3)
NM_001080481	ubiquitin specific peptidase 45(USP45)
NM_001080497	multiple EGF like domains 9(MEGF9)
NM_001080825	transmembrane protein 120B(TMEM120B)
NM_001080951	PLAG1 like zinc finger 1(PLAGL1)
NM_001081491	nuclear RNA export factor 1(NXF1)
NM_001082959	scavenger receptor class B member 1(SCARB1)
NM_001082969	chromosome 11 open reading frame 57(C11orf57)
NM_001085347	torsin family 2 member A(TOR2A)
NM_001085471	forkhead box N3(FOXN3)
NM_001092	active BCR-related(ABR)
NM_001093771	thioredoxin reductase 1(TXNRD1)
NM_001095	acid sensing ion channel subunit 1(ASIC1)
NM_001097633	glucosaminyl (N-acetyl) transferase 1, core 2(GCNT1)
NM_001098426	SWI/SNF related, matrix associated, actin dependent regulator of chromatin, subfamily d, member 2(SMARCD2)
NM_001098477	G-rich RNA sequence binding factor 1(GRSF1)
NM_001098482	CREB regulated transcription coactivator 1(CRTC1)
NM_001098484	solute carrier family 4 member 4(SLC4A4)
NM_001098833	ataxin 7 like 3(ATXN7L3)
NM_001099270	zinc finger and BTB domain containing 34(ZBTB34)
NM_001099287	NIPA like domain containing 4(NIPAL4)
NM_001099294	KIAA1644(KIAA1644)
NM_001099335	phytanoyl-CoA 2-hydroxylase interacting protein(PHYHIP)
NM_001099436	unc-51 like kinase 3(ULK3)
NM_001099439	EPH receptor A10(EPHA10)
NM_001099666	protein prenyltransferase alpha subunit repeat containing 1(PTAR1)
NM_001100829	transmembrane protein 170B(TMEM170B)
NM_001100913	phosphofurin acidic cluster sorting protein 2(PACS2)
NM_001102402	phosphatidylcholine transfer protein(PCTP)
NM_001102575	sorting nexin 18(SNX18)
NM_001104595	family with sequence similarity 118 member A(FAM118A)
NM_001104629	chromosome 4 open reading frame 19(C4orf19)
NM_001105192	transducin like enhancer of split 3(TLE3)
NM_001105573	F-box protein 45(FBXO45)
NM_001110199	serine/arginine repetitive matrix 3(SRRM3)
NM_001110514	early B-cell factor 4(EBF4)
NM_001111031	activin A receptor type 1C(ACVR1C)
NM_001111125	IQ motif and Sec7 domain 2(IQSEC2)
NM_001112707	tousled like kinase 2(TLK2)
NM_001113347	endothelin converting enzyme 1(ECE1)
NM_001114600	SUZ RNA binding domain containing 1(SZRD1)
NM_001122770	zinc finger and BTB domain containing 37(ZBTB37)
NM_001126060	nitric oxide synthase 1 adaptor protein(NOS1AP)
NM_001127208	tet methylcytosine dioxygenase 2(TET2)
NM_001127211	shootin 1(SHTN1)
NM_001127240	BCL2 binding component 3(BBC3)
NM_001127244	leucine rich repeat containing 8 family member A(LRRC8A)
NM_001127671	leukemia inhibitory factor receptor alpha(LIFR)
NM_001127696	ataxin 3(ATXN3)
NM_001128309	tetraspanin 14(TSPAN14)
NM_001128930	ectonucleoside triphosphate diphosphohydrolase 4(ENTPD4)
NM_001129993	KIAA1841(KIAA1841)
NM_001130721	ELOVL fatty acid elongase 6(ELOVL6)
NM_001130924	transmembrane protein 201(TMEM201)
NM_001130963	nuclear envelope integral membrane protein 1(NEMP1)
NM_001130965	Sad1 and UNC84 domain containing 1(SUN1)
NM_001130967	zinc finger protein 385A(ZNF385A)
NM_001134223	ubiquitin specific peptidase 46(USP46)
NM_001134285	estrogen related receptor gamma(ESRRG)
NM_001134363	RNA binding motif protein 20(RBM20)
NM_001134375	cyclin J(CCNJ)
NM_001134476	leucine rich repeat containing 8 family member B(LRRC8B)
NM_001134774	kinesin light chain 2(KLC2)
NM_001135004	DnaJ heat shock protein family (Hsp40) member B5(DNAJB5)
NM_001135032	eva-1 homolog A, regulator of programmed cell death(EVA1A)
NM_001135040	dynactin subunit 1(DCTN1)
NM_001135095	fibronectin type III domain containing 3B(FNDC3B)
NM_001135647	family with sequence similarity 53 member C(FAM53C)
NM_001135733	tumor protein p53 inducible nuclear protein 1(TP53INP1)
NM_001135999	RUN and SH3 domain containing 2(RUSC2)
NM_001136264	DAZ associated protein 2(DAZAP2)
NM_001137602	mediator of cell motility 1(MEMO1)
NM_001137675	ataxin 1 like(ATXN1L)
NM_001142275	non imprinted in Prader-Willi/Angelman syndrome 1(NIPA1)
NM_001142281	archain 1(ARCN1)
NM_001142348	sodium voltage-gated channel beta subunit 4(SCN4B)
NM_001142370	protein tyrosine phosphatase, non-receptor type 18(PTPN18)
NM_001142393	neural precursor cell expressed, developmentally down-regulated 9(NEDD9)
NM_001142447	ATPase Na+/K+ transporting family member beta 4(ATP1B4)
NM_001142546	leucine zipper protein 1(LUZP1)
NM_001143820	ETS proto-oncogene 1, transcription factor(ETS1)
NM_001143826	microtubule associated protein RP/EB family member 2(MAPRE2)
NM_001143941	RNA binding motif protein 24(RBM24)
NM_001144995	coiled-coil domain containing 85C(CCDC85C)
NM_001145077	leucine rich repeat containing 10B(LRRC10B)
NM_001145265	solute carrier family 35 member C1(SLC35C1)
NM_001145365	zinc finger protein 652(ZNF652)
NM_001145398	TEF, PAR bZIP transcription factor(TEF)
NM_001145548	zinc finger DHHC-type containing 7(ZDHHC7)
NM_001150	alanyl aminopeptidase, membrane(ANPEP)
NM_001160036	Rho related BTB domain containing 2(RHOBTB2)
NM_001161725	protein phosphatase 2 regulatory subunit B'gamma(PPP2R5C)
NM_001163	amyloid beta precursor protein binding family A member 1(APBA1)
NM_001164440	ankyrin repeat domain 33B(ANKRD33B)
NM_001164623	argonaute 2, RISC catalytic component(AGO2)
NM_001164829	chromosome 1 open reading frame 210(C1orf210)
NM_001166139	ligand dependent nuclear receptor corepressor like(LCORL)
NM_001166239	cell growth regulator with EF-hand domain 1(CGREF1)
NM_001167671	LIM domain containing preferred translocation partner in lipoma(LPP)
NM_001167856	strawberry notch homolog 1(SBNO1)
NM_001167882	ankyrin repeat domain 50(ANKRD50)
NM_001168724	transmembrane protein 135(TMEM135)
NM_001170460	cyclin dependent kinase 16(CDK16)
NM_001170701	muscleblind like splicing regulator 3(MBNL3)
NM_001170765	ligand dependent nuclear receptor corepressor(LCOR)
NM_001172128	interleukin 16(IL16)
NM_001172623	neogenin 1(NEO1)
NM_001172638	ZFP62 zinc finger protein(ZFP62)
NM_001173461	shisa family member 6(SHISA6)
NM_001173467	Sp7 transcription factor(SP7)
NM_001173476	SPEG complex locus(SPEG)
NM_001173988	RAB, member RAS oncogene family-like 6(RABL6)
NM_001174166	solute carrier family 16 member 6(SLC16A6)
NM_001178015	solute carrier family 4 member 10(SLC4A10)
NM_001178137	cytoplasmic polyadenylation element binding protein 3(CPEB3)
NM_001184796	extended synaptotagmin 1(ESYT1)
NM_001188	BCL2 antagonist/killer 1(BAK1)
NM_001190456	coronin 2B(CORO2B)
NM_001190737	nuclear factor I B(NFIB)
NM_001190964	zinc finger MYM-type containing 2(ZMYM2)
NM_001193288	solute carrier family 24 member 2(SLC24A2)
NM_001193421	teashirt zinc finger homeobox 2(TSHZ2)
NM_001193508	RE1 silencing transcription factor(REST)
NM_001195144	ankyrin repeat domain 44(ANKRD44)
NM_001195214	Yip1 domain family member 6(YIPF6)
NM_001195286	interferon regulatory factor 4(IRF4)
NM_001195573	dicer 1, ribonuclease III(DICER1)
NM_001197026	pleckstrin homology domain containing A8(PLEKHA8)
NM_001197320	BCL2 family apoptosis regulator(MCL1)
NM_001198	PR/SET domain 1(PRDM1)
NM_001198670	transmembrane protein 136(TMEM136)
NM_001198783	POU class 2 homeobox 1(POU2F1)
NM_001198972	KIAA1522(KIAA1522)
NM_001199699	DEAH-box helicase 33(DHX33)
NM_001199809	integrator complex subunit 7(INTS7)
NM_001199839	BCL2 like 2(BCL2L2)
NM_001199847	SMAD specific E3 ubiquitin protein ligase 1(SMURF1)
NM_001200050	N-acetylneuraminate pyruvate lyase(NPL)
NM_001204	bone morphogenetic protein receptor type 2(BMPR2)
NM_001204137	methyl-CpG binding domain protein 1(MBD1)
NM_001204298	zinc finger protein 664(ZNF664)
NM_001204456	RB associated KRAB zinc finger(RBAK)
NM_001204878	BCL2 associated athanogene 4(BAG4)
NM_001205228	sortilin 1(SORT1)
NM_001206491	mitochondrial antiviral signaling protein(MAVS)
NM_001206840	trans-golgi network protein 2(TGOLN2)
NM_001206998	zinc and ring finger 3(ZNRF3)
NM_001207024	mannose-6-phosphate receptor, cation dependent(M6PR)
NM_001207025	POU class 2 homeobox 2(POU2F2)
NM_001207033	ring finger protein 40(RNF40)
NM_001224	caspase 2(CASP2)
NM_001242314	mitogen-activated protein kinase kinase kinase 13(MAP3K13)
NM_001242318	phosphodiesterase 7A(PDE7A)
NM_001242412	aryl-hydrocarbon receptor repressor(AHRR)
NM_001242481	eukaryotic translation initiation factor 1A domain containing(EIF1AD)
NM_001242739	zinc finger protein 691(ZNF691)
NM_001315	mitogen-activated protein kinase 14(MAPK14)
NM_001408	cadherin EGF LAG seven-pass G-type receptor 2(CELSR2)
NM_001410	multiple EGF like domains 8(MEGF8)
NM_001419	ELAV like RNA binding protein 1(ELAVL1)
NM_001448	glypican 4(GPC4)
NM_001659	ADP ribosylation factor 3(ARF3)
NM_001795	cadherin 5(CDH5)
NM_001879	mannan binding lectin serine peptidase 1(MASP1)
NM_001884	hyaluronan and proteoglycan link protein 1(HAPLN1)
NM_001895	casein kinase 2 alpha 1(CSNK2A1)
NM_001946	dual specificity phosphatase 6(DUSP6)
NM_001947	dual specificity phosphatase 7(DUSP7)
NM_001949	E2F transcription factor 3(E2F3)
NM_001977	glutamyl aminopeptidase(ENPEP)
NM_001987	ETS variant 6(ETV6)
NM_002010	fibroblast growth factor 9(FGF9)
NM_002033	fucosyltransferase 4(FUT4)
NM_002146	homeobox B3(HOXB3)
NM_002207	integrin subunit alpha 9(ITGA9)
NM_002238	potassium voltage-gated channel subfamily H member 1(KCNH1)
NM_002252	potassium voltage-gated channel modifier subfamily S member 3(KCNS3)
NM_002309	leukemia inhibitory factor(LIF)
NM_002334	LDL receptor related protein 4(LRP4)
NM_002390	ADAM metallopeptidase domain 11(ADAM11)
NM_002419	mitogen-activated protein kinase kinase kinase 11(MAP3K11)
NM_002442	musashi RNA binding protein 1(MSI1)
NM_002446	mitogen-activated protein kinase kinase kinase 10(MAP3K10)
NM_002646	phosphatidylinositol-4-phosphate 3-kinase catalytic subunit type 2 beta(PIK3C2B)
NM_002657	PLAG1 like zinc finger 2(PLAGL2)
NM_002703	phosphoribosyl pyrophosphate amidotransferase(PPAT)
NM_002715	protein phosphatase 2 catalytic subunit alpha(PPP2CA)
NM_002943	RAR related orphan receptor A(RORA)
NM_002969	mitogen-activated protein kinase 12(MAPK12)
NM_003032	ST6 beta-galactoside alpha-2,6-sialyltransferase 1(ST6GAL1)
NM_003045	solute carrier family 7 member 1(SLC7A1)
NM_003108	SRY-box 11(SOX11)
NM_003109	Sp1 transcription factor(SP1)
NM_003131	serum response factor(SRF)
NM_003150	signal transducer and activator of transcription 3(STAT3)
NM_003173	suppressor of variegation 3-9 homolog 1(SUV39H1)
NM_003211	thymine DNA glycosylase(TDG)
NM_003326	tumor necrosis factor superfamily member 4(TNFSF4)
NM_003342	ubiquitin conjugating enzyme E2 G1(UBE2G1)
NM_003347	ubiquitin conjugating enzyme E2 L3(UBE2L3)
NM_003369	UV radiation resistance associated(UVRAG)
NM_003389	coronin 2A(CORO2A)
NM_003427	zinc finger protein 76(ZNF76)
NM_003458	bassoon presynaptic cytomatrix protein(BSN)
NM_003559	phosphatidylinositol-5-phosphate 4-kinase type 2 beta(PIP4K2B)
NM_003721	regulatory factor X associated ankyrin containing protein(RFXANK)
NM_003728	unc-5 netrin receptor C(UNC5C)
NM_003816	ADAM metallopeptidase domain 9(ADAM9)
NM_003901	sphingosine-1-phosphate lyase 1(SGPL1)
NM_003924	paired like homeobox 2b(PHOX2B)
NM_003957	BR serine/threonine kinase 2(BRSK2)
NM_004051	3-hydroxybutyrate dehydrogenase, type 1(BDH1)
NM_004090	dual specificity phosphatase 3(DUSP3)
NM_004091	E2F transcription factor 2(E2F2)
NM_004095	eukaryotic translation initiation factor 4E binding protein 1(EIF4EBP1)
NM_004118	forkhead box S1(FOXS1)
NM_004184	tryptophanyl-tRNA synthetase(WARS)
NM_004205	ubiquitin specific peptidase 2(USP2)
NM_004225	malignant fibrous histiocytoma amplified sequence 1(MFHAS1)
NM_004263	ssemaphorin 4F(SEMA4F)
NM_004283	RAB3D, member RAS oncogene family(RAB3D)
NM_004379	cAMP responsive element binding protein 1(CREB1)
NM_004386	neurocan(NCAN)
NM_004423	dishevelled segment polarity protein 3(DVL3)
NM_004427	polyhomeotic homolog 2(PHC2)
NM_004451	estrogen related receptor alpha(ESRRA)
NM_004474	forkhead box D2(FOXD2)
NM_004475	flotillin 2(FLOT2)
NM_004535	myelin transcription factor 1(MYT1)
NM_004561	ovo like transcriptional repressor 1(OVOL1)
NM_004588	sodium voltage-gated channel beta subunit 2(SCN2B)
NM_004620	TNF receptor associated factor 6(TRAF6)
NM_004656	BRCA1 associated protein 1(BAP1)
NM_004706	Rho guanine nucleotide exchange factor 1(ARHGEF1)
NM_004716	proprotein convertase subtilisin/kexin type 7(PCSK7)
NM_004756	NUMB like, endocytic adaptor protein(NUMBL)
NM_004759	mitogen-activated protein kinase-activated protein kinase 2(MAPKAPK2)
NM_004762	cytohesin 1(CYTH1)
NM_004775	beta-1,4-galactosyltransferase 6(B4GALT6)
NM_004841	RAS protein activator like 2(RASAL2)
NM_004869	vacuolar protein sorting 4 homolog B(VPS4B)
NM_004907	immediate early response 2(IER2)
NM_004936	cyclin dependent kinase inhibitor 2B(CDKN2B)
NM_004947	dedicator of cytokinesis 3(DOCK3)
NM_005065	SEL1L ERAD E3 ligase adaptor subunit(SEL1L)
NM_005094	solute carrier family 27 member 4(SLC27A4)
NM_005099	ADAM metallopeptidase with thrombospondin type 1 motif 4(ADAMTS4)
NM_005112	WD repeat domain 1(WDR1)
NM_005224	AT-rich interaction domain 3A(ARID3A)
NM_005342	high mobility group box 3(HMGB3)
NM_005359	SMAD family member 4(SMAD4)
NM_005433	YES proto-oncogene 1, Src family tyrosine kinase(YES1)
NM_005439	myeloid leukemia factor 2(MLF2)
NM_005475	SH2B adaptor protein 3(SH2B3)
NM_005477	hyperpolarization activated cyclic nucleotide gated potassium channel 4(HCN4)
NM_005575	leucyl and cystinyl aminopeptidase(LNPEP)
NM_005576	lysyl oxidase like 1(LOXL1)
NM_005668	ST8 alpha-N-acetyl-neuraminide alpha-2,8-sialyltransferase 4(ST8SIA4)
NM_005708	glypican 6(GPC6)
NM_005730	CTD small phosphatase 2(CTDSP2)
NM_005740	dynein axonemal light chain 4(DNAL4)
NM_005811	growth differentiation factor 11(GDF11)
NM_005845	ATP binding cassette subfamily C member 4(ABCC4)
NM_005920	myocyte enhancer factor 2D(MEF2D)
NM_005921	mitogen-activated protein kinase kinase kinase 1(MAP3K1)
NM_005940	matrix metallopeptidase 11(MMP11)
NM_005955	metal regulatory transcription factor 1(MTF1)
NM_006078	calcium voltage-gated channel auxiliary subunit gamma 2(CACNG2)
NM_006133	diacylglycerol lipase alpha(DAGLA)
NM_006190	origin recognition complex subunit 2(ORC2)
NM_006252	protein kinase AMP-activated catalytic subunit alpha 2(PRKAA2)
NM_006268	double PHD fingers 2(DPF2)
NM_006275	serine and arginine rich splicing factor 6(SRSF6)
NM_006290	TNF alpha induced protein 3(TNFAIP3)
NM_006378	semaphorin 4D(SEMA4D)
NM_006426	dihydropyrimidinase like 4(DPYSL4)
NM_006454	MAX dimerization protein 4(MXD4)
NM_006465	AT-rich interaction domain 3B(ARID3B)
NM_006478	growth arrest specific 2 like 1(GAS2L1)
NM_006520	dynein light chain Tctex-type 3(DYNLT3)
NM_006912	Ras like without CAAX 1(RIT1)
NM_006956	zinc finger protein 12(ZNF12)
NM_006997	transforming acidic coiled-coil containing protein 2(TACC2)
NM_007007	cleavage and polyadenylation specific factor 6(CPSF6)
NM_007172	nucleoporin 50(NUP50)
NM_007243	nurim (nuclear envelope membrane protein)(NRM)
NM_007260	lysophospholipase II(LYPLA2)
NM_007346	opioid growth factor receptor(OGFR)
NM_007372	DEAD-box helicase 42(DDX42)
NM_012166	F-box protein 10(FBXO10)
NM_012214	mannosyl (alpha-1,3-)-glycoprotein beta-1,4-N-acetylglucosaminyltransferase, isozyme A(MGAT4A)
NM_012234	RING1 and YY1 binding protein(RYBP)
NM_012249	ras homolog family member Q(RHOQ)
NM_012284	potassium voltage-gated channel subfamily H member 3(KCNH3)
NM_012285	potassium voltage-gated channel subfamily H member 4(KCNH4)
NM_012294	Rap guanine nucleotide exchange factor 5(RAPGEF5)
NM_012296	GRB2 associated binding protein 2(GAB2)
NM_012316	karyopherin subunit alpha 6(KPNA6)
NM_012338	tetraspanin 12(TSPAN12)
NM_012474	uridine-cytidine kinase 2(UCK2)
NM_012482	zinc finger protein 281(ZNF281)
NM_013368	SERTA domain containing 3(SERTAD3)
NM_013443	ST6 N-acetylgalactosaminide alpha-2,6-sialyltransferase 6(ST6GALNAC6)
NM_013449	bromodomain adjacent to zinc finger domain 2A(BAZ2A)
NM_014112	transcriptional repressor GATA binding 1(TRPS1)
NM_014252	solute carrier family 25 member 15(SLC25A15)
NM_014351	sulfotransferase family 4A member 1(SULT4A1)
NM_014409	TATA-box binding protein associated factor 5 like(TAF5L)
NM_014521	SH3 domain binding protein 4(SH3BP4)
NM_014603	cerebellar degeneration related protein 2 like(CDR2L)
NM_014674	ER degradation enhancing alpha-mannosidase like protein 1(EDEM1)
NM_014682	ST18, C2H2C-type zinc finger(ST18)
NM_014722	family with sequence similarity 65 member B(FAM65B)
NM_014734	sushi domain containing 6(SUSD6)
NM_014746	ring finger protein 144A(RNF144A)
NM_014761	IST1, ESCRT-III associated factor(IST1)
NM_014803	zinc finger protein 518A(ZNF518A)
NM_014817	TLR4 interactor with leucine rich repeats(TRIL)
NM_014901	ring finger protein 44(RNF44)
NM_014905	glutaminase(GLS)
NM_014980	syntaxin binding protein 5 like(STXBP5L)
NM_015044	golgi associated, gamma adaptin ear containing, ARF binding protein 2(GGA2)
NM_015063	solute carrier family 8 member A2(SLC8A2)
NM_015076	cyclin dependent kinase 19(CDK19)
NM_015077	sterile alpha and TIR motif containing 1(SARM1)
NM_015092	SMG1, nonsense mediated mRNA decay associated PI3K related kinase(SMG1)
NM_015094	HIC ZBTB transcriptional repressor 2(HIC2)
NM_015173	TBC1 domain family member 1(TBC1D1)
NM_015175	neurobeachin like 2(NBEAL2)
NM_015177	deltex E3 ubiquitin ligase 4(DTX4)
NM_015278	SAM and SH3 domain containing 1(SASH1)
NM_015288	jade family PHD finger 2(JADE2)
NM_015299	KH and NYN domain containing(KHNYN)
NM_015327	SMG5, nonsense mediated mRNA decay factor(SMG5)
NM_015393	prostate androgen-regulated mucin-like protein 1(PARM1)
NM_015517	histone H4 transcription factor(HINFP)
NM_015831	acetylcholinesterase (Cartwright blood group)(ACHE)
NM_015894	stathmin 3(STMN3)
NM_015898	zinc finger and BTB domain containing 7A(ZBTB7A)
NM_015912	family with sequence similarity 135 member B(FAM135B)
NM_015975	TATA-box binding protein associated factor 9b(TAF9B)
NM_015995	Kruppel like factor 13(KLF13)
NM_016021	ubiquitin conjugating enzyme E2 J1(UBE2J1)
NM_016075	vacuolar protein sorting 36 homolog(VPS36)
NM_016090	RNA binding motif protein 7(RBM7)
NM_016097	immediate early response 3 interacting protein 1(IER3IP1)
NM_016147	protein phosphatase methylesterase 1(PPME1)
NM_016219	mannosidase alpha class 1B member 1(MAN1B1)
NM_016339	Rap guanine nucleotide exchange factor like 1(RAPGEFL1)
NM_016399	TP53 regulated inhibitor of apoptosis 1(TRIAP1)
NM_016436	PHD finger protein 20(PHF20)
NM_016530	RAB8B, member RAS oncogene family(RAB8B)
NM_016531	Kruppel like factor 3(KLF3)
NM_016538	sirtuin 7(SIRT7)
NM_016577	RAB6B, member RAS oncogene family(RAB6B)
NM_017423	polypeptide N-acetylgalactosaminyltransferase 7(GALNT7)
NM_017495	RNA binding motif protein 38(RBM38)
NM_017510	transmembrane p24 trafficking protein 9(TMED9)
NM_017525	CDC42 binding protein kinase gamma(CDC42BPG)
NM_017554	poly(ADP-ribose) polymerase family member 14(PARP14)
NM_017612	zinc finger CCHC-type containing 8(ZCCHC8)
NM_017622	BLOC-1 related complex subunit 6(BORCS6)
NM_017633	family with sequence similarity 46 member A(FAM46A)
NM_017644	kelch like family member 24(KLHL24)
NM_017752	TBC1 domain family member 8B(TBC1D8B)
NM_017759	INO80 complex subunit D(INO80D)
NM_017789	semaphorin 4C(SEMA4C)
NM_017811	ubiquitin conjugating enzyme E2 R2(UBE2R2)
NM_017813	inositol monophosphatase domain containing 1(IMPAD1)
NM_017902	hypoxia inducible factor 1 alpha subunit inhibitor(HIF1AN)
NM_018046	angiogenic factor with G-patch and FHA domains 1(AGGF1)
NM_018243	septin 11(SEPT11)
NM_018320	ring finger protein 121(RNF121)
NM_018323	phosphatidylinositol 4-kinase type 2 beta(PI4K2B)
NM_018375	solute carrier family 39 member 9(SLC39A9)
NM_018403	decapping mRNA 1A(DCP1A)
NM_018488	T-box 4(TBX4)
NM_018566	YOD1 deubiquitinase(YOD1)
NM_018660	zinc finger protein 395(ZNF395)
NM_019096	GTP binding protein 2(GTPBP2)
NM_019121	protein phosphatase 1 regulatory subunit 37(PPP1R37)
NM_020170	nicalin(NCLN)
NM_020210	semaphorin 4B(SEMA4B)
NM_020309	solute carrier family 17 member 7(SLC17A7)
NM_020335	VANGL planar cell polarity protein 2(VANGL2)
NM_020340	ARFGEF family member 3(ARFGEF3)
NM_020348	cyclin and CBS domain divalent metal cation transport mediator 1(CNNM1)
NM_020390	eukaryotic translation initiation factor 5A2(EIF5A2)
NM_020453	ATPase phospholipid transporting 10D (putative)(ATP10D)
NM_020458	tetratricopeptide repeat domain 7A(TTC7A)
NM_020630	ret proto-oncogene(RET)
NM_020676	abhydrolase domain containing 6(ABHD6)
NM_020700	protein phosphatase, Mg2+/Mn2+ dependent 1H(PPM1H)
NM_020737	leucine rich repeat and fibronectin type III domain containing 2(LRFN2)
NM_020770	cingulin(CGN)
NM_020774	mindbomb E3 ubiquitin protein ligase 1(MIB1)
NM_020778	alpha kinase 3(ALPK3)
NM_020825	cramped chromatin regulator homolog 1(CRAMP1)
NM_020834	homeobox and leucine zipper encoding(HOMEZ)
NM_020853	family with sequence similarity 234 member B(FAM234B)
NM_020883	zinc finger SWIM-type containing 5(ZSWIM5)
NM_020897	hyperpolarization activated cyclic nucleotide gated potassium channel 3(HCN3)
NM_020921	ninein(NIN)
NM_020928	zinc finger SWIM-type containing 6(ZSWIM6)
NM_020935	ubiquitin specific peptidase 37(USP37)
NM_021012	potassium voltage-gated channel subfamily J member 12(KCNJ12)
NM_021090	myotubularin related protein 3(MTMR3)
NM_021116	adenylate cyclase 1(ADCY1)
NM_021161	potassium two pore domain channel subfamily K member 10(KCNK10)
NM_021184	chromosome 6 open reading frame 47(C6orf47)
NM_021241	widely interspaced zinc finger motifs(WIZ)
NM_021255	pellino E3 ubiquitin protein ligase family member 2(PELI2)
NM_021260	zinc finger FYVE-type containing 1(ZFYVE1)
NM_021643	tribbles pseudokinase 2(TRIB2)
NM_021964	zinc finger protein 148(ZNF148)
NM_022039	F-box and WD repeat domain containing 4(FBXW4)
NM_022048	casein kinase 1 gamma 1(CSNK1G1)
NM_022153	chromosome 10 open reading frame 54(C10orf54)
NM_022156	dihydrouridine synthase 1 like(DUS1L)
NM_022465	IKAROS family zinc finger 4(IKZF4)
NM_022484	transmembrane protein 168(TMEM168)
NM_022730	COP9 signalosome subunit 7B(COPS7B)
NM_022778	centrosomal protein 85(CEP85)
NM_022780	required for meiotic nuclear division 5 homolog A(RMND5A)
NM_022821	ELOVL fatty acid elongase 1(ELOVL1)
NM_023072	zinc finger SWIM-type containing 4(ZSWIM4)
NM_024293	family with sequence similarity 134 member A(FAM134A)
NM_024297	PHD finger protein 23(PHF23)
NM_024524	ATPase 13A3(ATP13A3)
NM_024565	cyclin J like(CCNJL)
NM_024572	polypeptide N-acetylgalactosaminyltransferase 14(GALNT14)
NM_024577	SH3 domain and tetratricopeptide repeats 2(SH3TC2)
NM_024582	FAT atypical cadherin 4(FAT4)
NM_024586	oxysterol binding protein like 9(OSBPL9)
NM_024626	V-set domain containing T cell activation inhibitor 1(VTCN1)
NM_024667	VPS37B, ESCRT-I subunit(VPS37B)
NM_024674	lin-28 homolog A(LIN28A)
NM_024701	ankyrin repeat and SOCS box containing 13(ASB13)
NM_024771	N(alpha)-acetyltransferase 40, NatD catalytic subunit(NAA40)
NM_024776	pseudopodium enriched atypical kinase 1(PEAK1)
NM_024789	major facilitator superfamily domain containing 13A(MFSD13A)
NM_024814	Cbl proto-oncogene like 1(CBLL1)
NM_024816	rabaptin, RAB GTPase binding effector protein 2(RABEP2)
NM_024874	KIAA0319 like(KIAA0319L)
NM_024923	nucleoporin 210(NUP210)
NM_024954	ubiquitin domain containing 1(UBTD1)
NM_025054	valosin containing protein interacting protein 1(VCPIP1)
NM_030576	LIM domain containing 2(LIMD2)
NM_030645	SH3 binding domain protein 5 like(SH3BP5L)
NM_030648	SET domain containing lysine methyltransferase 7(SETD7)
NM_030915	limb bud and heart development(LBH)
NM_030918	sorting nexin family member 27(SNX27)
NM_031231	N-terminal EF-hand calcium binding protein 3(NECAB3)
NM_031309	scratch family transcriptional repressor 1(SCRT1)
NM_031413	CECR2, histone acetyl-lysine reader(CECR2)
NM_031918	Kruppel like factor 16(KLF16)
NM_032184	synapse defective Rho GTPase homolog 2(SYDE2)
NM_032229	SLIT and NTRK like family member 6(SLITRK6)
NM_032242	plexin A1(PLXNA1)
NM_032364	DnaJ heat shock protein family (Hsp40) member C14(DNAJC14)
NM_032431	synoviolin 1(SYVN1)
NM_032548	ankyrin repeat and BTB domain containing 1(ABTB1)
NM_032557	ubiquitin specific peptidase 38(USP38)
NM_032558	major facilitator superfamily domain containing 14B(MFSD14B)
NM_032560	protein phosphatase 4 regulatory subunit 3A(PPP4R3A)
NM_032595	protein phosphatase 1 regulatory subunit 9B(PPP1R9B)
NM_032632	poly(A) polymerase alpha(PAPOLA)
NM_032701	lysine methyltransferase 5C(KMT5C)
NM_032827	atonal bHLH transcription factor 8(ATOH8)
NM_032857	lactamase beta(LACTB)
NM_032885	autophagy related 4D cysteine peptidase(ATG4D)
NM_033083	ELL associated factor 1(EAF1)
NM_033129	scratch family transcriptional repressor 2(SCRT2)
NM_033260	forkhead box Q1(FOXQ1)
NM_033272	potassium voltage-gated channel subfamily H member 7(KCNH7)
NM_033315	RAS like family 10 member B(RASL10B)
NM_033387	family with sequence similarity 78 member A(FAM78A)
NM_033540	mitofusin 1(MFN1)
NM_033656	bromodomain and WD repeat domain containing 1(BRWD1)
NM_052851	StAR related lipid transfer domain containing 13(STARD13)
NM_052932	transmembrane protein 123(TMEM123)
NM_058172	anthrax toxin receptor 2(ANTXR2)
NM_078471	myosin XVIIIA(MYO18A)
NM_080621	sterile alpha motif domain containing 10(SAMD10)
NM_080670	solute carrier family 35 member A4(SLC35A4)
NM_080722	ADAM metallopeptidase with thrombospondin type 1 motif 14(ADAMTS14)
NM_080862	splA/ryanodine receptor domain and SOCS box containing 4(SPSB4)
NM_080867	suppressor of cytokine signaling 4(SOCS4)
NM_130809	proline rich coiled-coil 1(PRRC1)
NM_133264	WAS/WASL interacting protein family member 2(WIPF2)
NM_133455	EMI domain containing 1(EMID1)
NM_133459	collagen and calcium binding EGF domains 1(CCBE1)
NM_133625	synapsin II(SYN2)
NM_138340	abhydrolase domain containing 3(ABHD3)
NM_138342	galactosidase beta 1 like 2(GLB1L2)
NM_138769	ras homolog family member T2(RHOT2)
NM_139018	CD300 molecule like family member f(CD300LF)
NM_139055	ADAM metallopeptidase with thrombospondin type 1 motif 15(ADAMTS15)
NM_139159	dipeptidyl peptidase 9(DPP9)
NM_144775	Smith-Magenis syndrome chromosome region, candidate 8(SMCR8)
NM_145166	zinc finger and BTB domain containing 47(ZBTB47)
NM_145185	mitogen-activated protein kinase kinase 7(MAP2K7)
NM_145313	RasGEF domain family member 1A(RASGEF1A)
NM_148893	small VCP interacting protein(SVIP)
NM_152293	transcriptional adaptor 2B(TADA2B)
NM_152345	ankyrin repeat domain 13B(ANKRD13B)
NM_152383	DIS3 like 3'-5' exoribonuclease 2(DIS3L2)
NM_152405	junction mediating and regulatory protein, p53 cofactor(JMY)
NM_152455	zinc finger and SCAN domain containing 29(ZSCAN29)
NM_152490	beta-1,3-N-acetylgalactosaminyltransferase 2(B3GALNT2)
NM_152663	Ral GEF with PH domain and SH3 binding motif 2(RALGPS2)
NM_152678	DENN domain containing 6A(DENND6A)
NM_152704	APC membrane recruitment protein 2(AMER2)
NM_152729	5'-nucleotidase domain containing 1(NT5DC1)
NM_152914	N-acetyltransferase domain containing 1(NATD1)
NM_153267	MAM domain containing 2(MAMDC2)
NM_153354	transmembrane protein 161B(TMEM161B)
NM_173505	ankyrin repeat domain 29(ANKRD29)
NM_173514	solute carrier family 38 member 9(SLC38A9)
NM_173642	ribosomal modification protein rimK like family member A(RIMKLA)
NM_173689	crumbs 2, cell polarity complex component(CRB2)
NM_173814	protogenin(PRTG)
NM_173822	family with sequence similarity 126 member B(FAM126B)
NM_173833	scavenger receptor class A member 5(SCARA5)
NM_175709	chromobox 7(CBX7)
NM_175748	ubiquitin protein ligase E3 component n-recognin 7 (putative)(UBR7)
NM_175884	coiled-coil domain containing 71-like(CCDC71L)
NM_178026	gamma-glutamyltransferase 7(GGT7)
NM_178126	family with sequence similarity 134 member C(FAM134C)
NM_178454	DNA damage regulated autophagy modulator 2(DRAM2)
NM_181701	quiescin sulfhydryl oxidase 2(QSOX2)
NM_181785	solute carrier family 46 member 3(SLC46A3)
NM_182487	olfactomedin like 2A(OLFML2A)
NM_182488	ubiquitin specific peptidase 12(USP12)
NM_182526	transmembrane protein 229B(TMEM229B)
NM_182757	ring finger protein 144B(RNF144B)
NM_197956	nuclear apoptosis inducing factor 1(NAIF1)
NM_198141	glucosidase alpha, neutral C(GANC)
NM_198182	grainyhead like transcription factor 1(GRHL1)
NM_198279	chromosome X open reading frame 23(CXorf23)
NM_198478	NTPase, KAP family P-loop domain containing 1(NKPD1)
NM_198488	family with sequence similarity 83 member H(FAM83H)
NM_198527	HD domain containing 3(HDDC3)
NM_198549	mitoguardin 1(MIGA1)
NM_199054	MAP kinase interacting serine/threonine kinase 2(MKNK2)
NM_203403	leucine rich adaptor protein 1 like(LURAP1L)
NM_206853	QKI, KH domain containing RNA binding(QKI)
NM_207313	transmembrane protein 132E(TMEM132E)
NM_207346	tRNA splicing endonuclease subunit 54(TSEN54)
NM_207370	G protein-coupled receptor 153(GPR153)
NM_207446	family with sequence similarity 174 member B(FAM174B)
NM_001242691
NM_144993
Figure 3–Table Supplement 3. Conserved mRNA targets of miR-128 between humans & mice.
RefSeq_ID	Gene Name
NM_000021	presenilin 1(PSEN1)
NM_000037	ankyrin 1(ANK1)
NM_000068	calcium voltage-gated channel subunit alpha1 A(CACNA1A)
NM_000084	chloride voltage-gated channel 5(CLCN5)
NM_000208	insulin receptor(INSR)
NM_000214	jagged 1(JAG1)
NM_000217	potassium voltage-gated channel subfamily A member 1(KCNA1)
NM_000245	MET proto-oncogene, receptor tyrosine kinase(MET)
NM_000267	neurofibromin 1(NF1)
NM_000289	phosphofructokinase, muscle(PFKM)
NM_000368	tuberous sclerosis 1(TSC1)
NM_000408	glycerol-3-phosphate dehydrogenase 2(GPD2)
NM_000461	thyroid hormone receptor beta(THRB)
NM_000522	homeobox A13(HOXA13)
NM_000527	low density lipoprotein receptor(LDLR)
NM_000555	doublecortin(DCX)
NM_000615	neural cell adhesion molecule 1(NCAM1)
NM_000676	adenosine A2b receptor(ADORA2B)
NM_000724	calcium voltage-gated channel auxiliary subunit beta 2(CACNB2)
NM_000757	colony stimulating factor 1(CSF1)
NM_000827	glutamate ionotropic receptor AMPA type subunit 1(GRIA1)
NM_000828	glutamate ionotropic receptor AMPA type subunit 3(GRIA3)
NM_000829	glutamate ionotropic receptor AMPA type subunit 4(GRIA4)
NM_000831	glutamate ionotropic receptor kainate type subunit 3(GRIK3)
NM_000836	glutamate ionotropic receptor NMDA type subunit 2D(GRIN2D)
NM_000842	glutamate metabotropic receptor 5(GRM5)
NM_000921	phosphodiesterase 3A(PDE3A)
NM_000922	phosphodiesterase 3B(PDE3B)
NM_000924	phosphodiesterase 1B(PDE1B)
NM_000964	retinoic acid receptor alpha(RARA)
NM_001001323	ATPase plasma membrane Ca2+ transporting 1(ATP2B1)
NM_001001433	syntaxin 16(STX16)
NM_001001481	ubiquitin conjugating enzyme E2 W (putative)(UBE2W)
NM_001001664	speckle type BTB/POZ protein like(SPOPL)
NM_001001669	Rho guanine nucleotide exchange factor 37(ARHGEF37)
NM_001001890	runt related transcription factor 1(RUNX1)
NM_001001928	peroxisome proliferator activated receptor alpha(PPARA)
NM_001002814	RAB11 family interacting protein 1(RAB11FIP1)
NM_001002838	WNK lysine deficient protein kinase 3(WNK3)
NM_001002912	glutamate rich 3(ERICH3)
NM_001003652	SMAD family member 2(SMAD2)
NM_001003698	ras responsive element binding protein 1(RREB1)
NM_001003760	kelch like family member 31(KLHL31)
NM_001004019	fibulin 2(FBLN2)
NM_001004354	NOTCH-regulated ankyrin repeat protein(NRARP)
NM_001005353	adenylate kinase 4(AK4)
NM_001005388	neurofascin(NFASC)
NM_001005404	yippee like 2(YPEL2)
NM_001005408	neuralized E3 ubiquitin protein ligase 4(NEURL4)
NM_001005463	early B-cell factor 3(EBF3)
NM_001006944	ribosomal protein S6 kinase A4(RPS6KA4)
NM_001007156	neurotrophic receptor tyrosine kinase 3(NTRK3)
NM_001007237	immunoglobulin superfamily member 3(IGSF3)
NM_001007559	SS18, nBAF chromatin remodeling complex subunit(SS18)
NM_001008392	CTD small phosphatase like(CTDSPL)
NM_001008397	glutathione peroxidase 8 (putative)(GPX8)
NM_001008410	STEAP3 metalloreductase(STEAP3)
NM_001008493	enabled homolog (Drosophila)(ENAH)
NM_001008495	transmembrane protein 64(TMEM64)
NM_001008707	echinoderm microtubule associated protein like 1(EML1)
NM_001008781	FAT atypical cadherin 3(FAT3)
NM_001009899	upstream transcription factor family member 3(USF3)
NM_001010861	phospholipid phosphatase related 5(PLPPR5)
NM_001010888	zinc finger CCCH-type containing 12B(ZC3H12B)
NM_001010898	solute carrier family 6 member 17(SLC6A17)
NM_001010911	cancer susceptibility candidate 10(CASC10)
NM_001010942	RAP1B, member of RAS oncogene family(RAP1B)
NM_001012241	male specific lethal 1 homolog(MSL1)
NM_001012426	forkhead box P4(FOXP4)
NM_001012981	zinc finger with KRAB and SCAN domains 2(ZKSCAN2)
NM_001013415	F-box and WD repeat domain containing 7(FBXW7)
NM_001014435	carbonic anhydrase 7(CA7)
NM_001015877	PHD finger protein 6(PHF6)
NM_001017395	transmembrane and coiled-coil domain family 1(TMCC1)
NM_001017424	potassium two pore domain channel subfamily K member 2(KCNK2)
NM_001017926	zinc fingers and homeoboxes 1(ZHX1)
NM_001018039	Scm-like with four mbt domains 2(SFMBT2)
NM_001024649	calnexin(CANX)
NM_001024668	LETM1 domain containing 1(LETMD1)
NM_001025108	AF4/FMR2 family member 3(AFF3)
NM_001025780	abhydrolase domain containing 17B(ABHD17B)
NM_001029835	CCM2 scaffolding protein(CCM2)
NM_001029851	phosphodiesterase 8B(PDE8B)
NM_001029858	solute carrier family 35 member F1(SLC35F1)
NM_001029863	chromosome 6 open reading frame 120(C6orf120)
NM_001029998	solute carrier family 10 member 7(SLC10A7)
NM_001031716	nucleic acid binding protein 1(NABP1)
NM_001031740	mannosidase endo-alpha like(MANEAL)
NM_001032288	ubiquitin conjugating enzyme E2 V1(UBE2V1)
NM_001032296	serine/threonine kinase 24(STK24)
NM_001032394	adhesion G protein-coupled receptor G6(ADGRG6)
NM_001033112	poly(A) binding protein interacting protein 2(PAIP2)
NM_001033677	calcium binding protein 1(CABP1)
NM_001033723	zinc finger protein 704(ZNF704)
NM_001034173	aldehyde dehydrogenase 1 family member L2(ALDH1L2)
NM_001035254	family with sequence similarity 102 member A(FAM102A)
NM_001037293	paralemmin 2(PALM2)
NM_001037324	endothelin converting enzyme 2(ECE2)
NM_001037442	RUN and FYVE domain containing 3(RUFY3)
NM_001037553	1-acylglycerol-3-phosphate O-acyltransferase 3(AGPAT3)
NM_001039459	engulfment and cell motility 1(ELMO1)
NM_001039690	chromosome transmission fidelity factor 8(CHTF8)
NM_001039780	cyclin I family member 2(CCNI2)
NM_001039877	striatin 4(STRN4)
NM_001039970	protein tyrosine phosphatase, non-receptor type 5(PTPN5)
NM_001040057	family with sequence similarity 133 member B(FAM133B)
NM_001040097	motile sperm domain containing 3(MOSPD3)
NM_001040402	defective in cullin neddylation 1 domain containing 4(DCUN1D4)
NM_001040439	mitogen-activated protein kinase 8 interacting protein 3(MAPK8IP3)
NM_001042546	ATP synthase mitochondrial F1 complex assembly factor 1(ATPAF1)
NM_001042575	transmembrane protease, serine 7(TMPRSS7)
NM_001042681	arginine-glutamic acid dipeptide repeats(RERE)
NM_001077181	cell division cycle 14B(CDC14B)
NM_001077498	family with sequence similarity 222 member B(FAM222B)
NM_001078166	serine and arginine rich splicing factor 1(SRSF1)
NM_001079519	family with sequence similarity 177 member A1(FAM177A1)
NM_001079526	IKAROS family zinc finger 2(IKZF2)
NM_001079874	vav guanine nucleotide exchange factor 3(VAV3)
NM_001080396	family with sequence similarity 155 member A(FAM155A)
NM_001080414	coiled-coil domain containing 88C(CCDC88C)
NM_001080418	DLG associated protein 3(DLGAP3)
NM_001080420	SH3 and multiple ankyrin repeat domains 3(SHANK3)
NM_001080450	BEN domain containing 3(BEND3)
NM_001080494	tetratricopeptide repeat domain 39A(TTC39A)
NM_001080495	trinucleotide repeat containing 18(TNRC18)
NM_001080534	unc-13 homolog C(UNC13C)
NM_001080951	PLAG1 like zinc finger 1(PLAGL1)
NM_001081491	nuclear RNA export factor 1(NXF1)
NM_001082533	carbonic anhydrase 10(CA10)
NM_001083913	WW domain binding protein 1-like(WBP1L)
NM_001083962	transcription factor 4(TCF4)
NM_001085471	forkhead box N3(FOXN3)
NM_001098202	HIC ZBTB transcriptional repressor 1(HIC1)
NM_001098204	heterogeneous nuclear ribonucleoprotein F(HNRNPF)
NM_001098482	CREB regulated transcription coactivator 1(CRTC1)
NM_001098510	pellino E3 ubiquitin protein ligase family member 3(PELI3)
NM_001098576	transmembrane BAX inhibitor motif containing 6(TMBIM6)
NM_001098814	sarcalumenin(SRL)
NM_001099270	zinc finger and BTB domain containing 34(ZBTB34)
NM_001099287	NIPA like domain containing 4(NIPAL4)
NM_001099402	cyclin K(CCNK)
NM_001099415	POM121 transmembrane nucleoporin C(POM121C)
NM_001100411	family with sequence similarity 184 member A(FAM184A)
NM_001100412	drosha ribonuclease III(DROSHA)
NM_001100590	KIAA0232(KIAA0232)
NM_001100829	transmembrane protein 170B(TMEM170B)
NM_001101372	IgLON family member 5(IGLON5)
NM_001101676	sterile alpha motif domain containing 12(SAMD12)
NM_001102575	sorting nexin 18(SNX18)
NM_001103146	GRB10 interacting GYF protein 2(GIGYF2)
NM_001105529	ATPase phospholipid transporting 8A1(ATP8A1)
NM_001109754	protein tyrosine phosphatase, receptor type B(PTPRB)
NM_001110514	early B-cell factor 4(EBF4)
NM_001111018	neuron navigator 2(NAV2)
NM_001111031	activin A receptor type 1C(ACVR1C)
NM_001112707	tousled like kinase 2(TLK2)
NM_001112732	MCF.2 cell line derived transforming sequence like(MCF2L)
NM_001113178	nuclear factor of activated T-cells 5(NFAT5)
NM_001113239	homeodomain interacting protein kinase 2(HIPK2)
NM_001113347	endothelin converting enzyme 1(ECE1)
NM_001114	adenylate cyclase 7(ADCY7)
NM_001114118	nuclear cap binding subunit 3(NCBP3)
NM_001114135	dematin actin binding protein(DMTN)
NM_001114171	FosB proto-oncogene, AP-1 transcription factor subunit(FOSB)
NM_001114600	SUZ RNA binding domain containing 1(SZRD1)
NM_001114617	mannosyl (alpha-1,3-)-glycoprotein beta-1,2-N-acetylglucosaminyltransferase(MGAT1)
NM_001114634	PLAG1 zinc finger(PLAG1)
NM_001122821	SET nuclear proto-oncogene(SET)
NM_001122824	transforming acidic coiled-coil containing protein 1(TACC1)
NM_001122842	nuclear receptor coactivator 7(NCOA7)
NM_001127217	SMAD family member 9(SMAD9)
NM_001127240	BCL2 binding component 3(BBC3)
NM_001127321	chromobox 5(CBX5)
NM_001127397	endoplasmic reticulum lectin 1(ERLEC1)
NM_001127671	leukemia inhibitory factor receptor alpha(LIFR)
NM_001127897	RPGRIP1 like(RPGRIP1L)
NM_001128225	solute carrier family 39 member 13(SLC39A13)
NM_001128617	RALBP1 associated Eps domain containing 1(REPS1)
NM_001130006	G1 to S phase transition 1(GSPT1)
NM_001130414	amyloid beta precursor protein binding family A member 2(APBA2)
NM_001130690	phosphodiesterase 10A(PDE10A)
NM_001130721	ELOVL fatty acid elongase 6(ELOVL6)
NM_001130916	transforming growth factor beta receptor 1(TGFBR1)
NM_001130967	zinc finger protein 385A(ZNF385A)
NM_001130991	hypoxia up-regulated 1(HYOU1)
NM_001134223	ubiquitin specific peptidase 46(USP46)
NM_001134367	solute carrier family 6 member 6(SLC6A6)
NM_001134375	cyclin J(CCNJ)
NM_001134445	dimethylarginine dimethylaminohydrolase 1(DDAH1)
NM_001134647	actin filament associated protein 1(AFAP1)
NM_001134673	nuclear factor I A(NFIA)
NM_001135024	pyruvate dehydrogenase complex component X(PDHX)
NM_001135187	ArfGAP with FG repeats 1(AGFG1)
NM_001135597	coiled-coil domain containing 88A(CCDC88A)
NM_001135669	xenotropic and polytropic retrovirus receptor 1(XPR1)
NM_001135773	spermatogenesis associated 2(SPATA2)
NM_001135805	synaptotagmin 1(SYT1)
NM_001136000	ABL proto-oncogene 2, non-receptor tyrosine kinase(ABL2)
NM_001136002	transmembrane protein 229A(TMEM229A)
NM_001136004	microtubule associated monooxygenase, calponin and LIM domain containing 3(MICAL3)
NM_001136024	NHS actin remodeling regulator(NHS)
NM_001136044	transmembrane and ubiquitin like domain containing 1(TMUB1)
NM_001136154	ERG, ETS transcription factor(ERG)
NM_001136223	REST corepressor 3(RCOR3)
NM_001136264	DAZ associated protein 2(DAZAP2)
NM_001136265	intermediate filament family orphan 2(IFFO2)
NM_001136472	lipopolysaccharide induced TNF factor(LITAF)
NM_001136493	major facilitator superfamily domain containing 2A(MFSD2A)
NM_001136504	synaptotagmin 2(SYT2)
NM_001137550	LRR binding FLII interacting protein 1(LRRFIP1)
NM_001137560	transmembrane protein 151B(TMEM151B)
NM_001137601	zinc finger and BTB domain containing 42(ZBTB42)
NM_001141945	actin, alpha 2, smooth muscle, aorta(ACTA2)
NM_001142474	neuronal regeneration related protein(NREP)
NM_001142498	sirtuin 1(SIRT1)
NM_001142531	SH2 domain containing 3C(SH2D3C)
NM_001142624	RAB34, member RAS oncogene family(RAB34)
NM_001142641	fibrosin like 1(FBRSL1)
NM_001142651	neuralized E3 ubiquitin protein ligase 1B(NEURL1B)
NM_001142685	Rho GTPase activating protein 32(ARHGAP32)
NM_001142699	discs large MAGUK scaffold protein 2(DLG2)
NM_001143824	solute carrier family 38 member 4(SLC38A4)
NM_001143826	microtubule associated protein RP/EB family member 2(MAPRE2)
NM_001144034	transmembrane protein 25(TMEM25)
NM_001144826	RUN domain containing 3A(RUNDC3A)
NM_001144877	suppressor of cancer cell invasion(SCAI)
NM_001144995	coiled-coil domain containing 85C(CCDC85C)
NM_001145001	NIMA related kinase 6(NEK6)
NM_001145155	nuclear receptor subfamily 2 group F member 2(NR2F2)
NM_001145365	zinc finger protein 652(ZNF652)
NM_001145368	protein tyrosine phosphatase, non-receptor type 3(PTPN3)
NM_001145418	tetratricopeptide repeat domain 28(TTC28)
NM_001145425	nuclear receptor subfamily 1 group D member 2(NR1D2)
NM_001145520	retinoic acid induced 14(RAI14)
NM_001145524	yippee like 3(YPEL3)
NM_001145661	GATA binding protein 2(GATA2)
NM_001146008	solute carrier organic anion transporter family member 5A1(SLCO5A1)
NM_001146029	semaphorin 7A (John Milton Hagen blood group)(SEMA7A)
NM_001146156	glycogen synthase kinase 3 beta(GSK3B)
NM_001146312	myocardin(MYOCD)
NM_001159547	BEN domain containing 4(BEND4)
NM_001159770	solute carrier family 39 member 11(SLC39A11)
NM_001160	apoptotic peptidase activating factor 1(APAF1)
NM_001160226	cannabinoid receptor 1(CNR1)
NM_001161504	aldehyde dehydrogenase 4 family member A1(ALDH4A1)
NM_001162497	lysophosphatidic acid receptor 6(LPAR6)
NM_001163321	coiled-coil domain containing 120(CCDC120)
NM_001164579	chromosome 16 open reading frame 52(C16orf52)
NM_001164623	argonaute 2, RISC catalytic component(AGO2)
NM_001164665	KIAA1549(KIAA1549)
NM_001164749	neuronal PAS domain protein 3(NPAS3)
NM_001164766	zinc finger homeobox 3(ZFHX3)
NM_001165903	syntaxin 1A(STX1A)
NM_001166005	erythrocyte membrane protein band 4.1(EPB41)
NM_001166055	endothelin receptor type A(EDNRA)
NM_001166139	ligand dependent nuclear receptor corepressor like(LCORL)
NM_001166160	protein phosphatase 1 regulatory subunit 9A(PPP1R9A)
NM_001167621	ataxin 10(ATXN10)
NM_001167827	transcription factor EB(TFEB)
NM_001167830	transmembrane p24 trafficking protein 5(TMED5)
NM_001168388	Cbp/p300 interacting transactivator with Glu/Asp rich carboxy-terminal domain 2(CITED2)
NM_001168683	taxilin gamma(TXLNG)
NM_001169117	stromal interaction molecule 2(STIM2)
NM_001170637	SLIT-ROBO Rho GTPase activating protein 2(SRGAP2)
NM_001170765	ligand dependent nuclear receptor corepressor(LCOR)
NM_001170803	La ribonucleoprotein domain family member 4(LARP4)
NM_001170931	forkhead box O4(FOXO4)
NM_001171184	dystrophin related protein 2(DRP2)
NM_001171805	poly(A) RNA polymerase D7, non-canonical(PAPD7)
NM_001172085	TATA-box binding protein(TBP)
NM_001172411	VANGL planar cell polarity protein 1(VANGL1)
NM_001172509	SATB homeobox 2(SATB2)
NM_001172623	neogenin 1(NEO1)
NM_001172766	forkhead box P2(FOXP2)
NM_001172774	dpy-19 like 3 (C. elegans)(DPY19L3)
NM_001173461	shisa family member 6(SHISA6)
NM_001173484	nebulette(NEBL)
NM_001173524	TROVE domain family member 2(TROVE2)
NM_001174146	LIM homeobox transcription factor 1 beta(LMX1B)
NM_001178102	lysyl oxidase(LOX)
NM_001178137	cytoplasmic polyadenylation element binding protein 3(CPEB3)
NM_001184906	F-box and leucine rich repeat protein 20(FBXL20)
NM_001184985	WNK lysine deficient protein kinase 1(WNK1)
NM_001189	NK3 homeobox 2(NKX3-2)
NM_001190463	cystathionine gamma-lyase(CTH)
NM_001190737	nuclear factor I B(NFIB)
NM_001190946	family with sequence similarity 193 member B(FAM193B)
NM_001191028	transportin 3(TNPO3)
NM_001191322	gremlin 1, DAN family BMP antagonist(GREM1)
NM_001193388	unkempt family like zinc finger(UNKL)
NM_001194937	pogo transposable element with ZNF domain(POGZ)
NM_001195076	chromosome 19 open reading frame 81(C19orf81)
NM_001195215	DENN domain containing 1B(DENND1B)
NM_001195278	transmembrane protein 178B(TMEM178B)
NM_001195286	interferon regulatory factor 4(IRF4)
NM_001195296	mirror-image polydactyly 1(MIPOL1)
NM_001195517	T-cell leukemia homeobox 1(TLX1)
NM_001195626	myeloid/lymphoid or mixed-lineage leukemia; translocated to, 10(MLLT10)
NM_001195683	transforming growth factor beta receptor 3(TGFBR3)
NM_001195728	solute carrier family 1 member 2(SLC1A2)
NM_001197104	lysine methyltransferase 2A(KMT2A)
NM_001198546	nucleolar protein 4(NOL4)
NM_001198783	POU class 2 homeobox 1(POU2F1)
NM_001198812	MSANTD3-TMEFF1 readthrough(MSANTD3-TMEFF1)
NM_001198939	dystrobrevin alpha(DTNA)
NM_001198999	semaphorin 6D(SEMA6D)
NM_001199054	cell death inducing p53 target 1(CDIP1)
NM_001199140	AMMECR1 like(AMMECR1L)
NM_001199155	lysine acetyltransferase 7(KAT7)
NM_001199199	adenylate kinase 2(AK2)
NM_001199417	Rho GTPase activating protein 23(ARHGAP23)
NM_001199427	TNF receptor associated factor 3(TRAF3)
NM_001199775	carboxypeptidase D(CPD)
NM_001199873	beta-1,4-galactosyltransferase 3(B4GALT3)
NM_001201	bone morphogenetic protein 3(BMP3)
NM_001202438	erythroid differentiation regulatory factor 1(EDRF1)
NM_001204062	COMMD3-BMI1 readthrough(COMMD3-BMI1)
NM_001204077	ubiquitination factor E4A(UBE4A)
NM_001204087	potassium calcium-activated channel subfamily N member 3(KCNN3)
NM_001204171	MDM4, p53 regulator(MDM4)
NM_001204416	regulator of G-protein signaling 6(RGS6)
NM_001204426	LIM domain kinase 1(LIMK1)
NM_001204869	WNT1 inducible signaling pathway protein 1(WISP1)
NM_001206615	ETS homologous factor(EHF)
NM_001206840	trans-golgi network protein 2(TGOLN2)
NM_001207063	coxsackie virus and adenovirus receptor(CXADR)
NM_001218	carbonic anhydrase 12(CA12)
NM_001220473	PTPRF interacting protein alpha 2(PPFIA2)
NM_001220482	Meis homeobox 2(MEIS2)
NM_001220765	IKAROS family zinc finger 1(IKZF1)
NM_001241	cyclin T2(CCNT2)
NM_001242377	decapping mRNA 2(DCP2)
NM_001242409	GRB2 associated regulator of MAPK1 subtype 1(GAREM1)
NM_001242466	phosphoinositide-3-kinase regulatory subunit 1(PIK3R1)
NM_001242617	nuclear transport factor 2 like export factor 2(NXT2)
NM_001242628	glucose-fructose oxidoreductase domain containing 1(GFOD1)
NM_001263	CDP-diacylglycerol synthase 1(CDS1)
NM_001286	chloride voltage-gated channel 6(CLCN6)
NM_001315	mitogen-activated protein kinase 14(MAPK14)
NM_001321	cysteine and glycine rich protein 2(CSRP2)
NM_001405	ephrin A2(EFNA2)
NM_001426	engrailed homeobox 1(EN1)
NM_001427	engrailed homeobox 2(EN2)
NM_001470	gamma-aminobutyric acid type B receptor subunit 1(GABBR1)
NM_001543	N-deacetylase and N-sulfotransferase 1(NDST1)
NM_001584	metallophosphoesterase domain containing 2(MPPED2)
NM_001616	activin A receptor type 2A(ACVR2A)
NM_001656	tripartite motif containing 23(TRIM23)
NM_001690	ATPase H+ transporting V1 subunit A(ATP6V1A)
NM_001795	cadherin 5(CDH5)
NM_001797	cadherin 11(CDH11)
NM_001884	hyaluronan and proteoglycan link protein 1(HAPLN1)
NM_001945	heparin binding EGF like growth factor(HBEGF)
NM_001949	E2F transcription factor 3(E2F3)
NM_001969	eukaryotic translation initiation factor 5(EIF5)
NM_002015	forkhead box O1(FOXO1)
NM_002039	GRB2 associated binding protein 1(GAB1)
NM_002056	glutamine--fructose-6-phosphate transaminase 1(GFPT1)
NM_002076	glucosamine (N-acetyl)-6-sulfatase(GNS)
NM_002086	growth factor receptor bound protein 2(GRB2)
NM_002089	C-X-C motif chemokine ligand 2(CXCL2)
NM_002196	INSM transcriptional repressor 1(INSM1)
NM_002202	ISL LIM homeobox 1(ISL1)
NM_002203	integrin subunit alpha 2(ITGA2)
NM_002205	integrin subunit alpha 5(ITGA5)
NM_002267	karyopherin subunit alpha 3(KPNA3)
NM_002270	transportin 1(TNPO1)
NM_002338	limbic system-associated membrane protein(LSAMP)
NM_002356	myristoylated alanine rich protein kinase C substrate(MARCKS)
NM_002359	MAF bZIP transcription factor G(MAFG)
NM_002372	mannosidase alpha class 2A member 1(MAN2A1)
NM_002381	matrilin 3(MATN3)
NM_002495	NADH:ubiquinone oxidoreductase subunit S4(NDUFS4)
NM_002497	NIMA related kinase 2(NEK2)
NM_002504	nuclear transcription factor, X-box binding 1(NFX1)
NM_002507	nerve growth factor receptor(NGFR)
NM_002515	NOVA alternative splicing regulator 1(NOVA1)
NM_002522	neuronal pentraxin 1(NPTX1)
NM_002523	neuronal pentraxin 2(NPTX2)
NM_002553	origin recognition complex subunit 5(ORC5)
NM_002569	furin, paired basic amino acid cleaving enzyme(FURIN)
NM_002581	pappalysin 1(PAPPA)
NM_002596	cyclin dependent kinase 18(CDK18)
NM_002613	3-phosphoinositide dependent protein kinase 1(PDPK1)
NM_002634	prohibitin(PHB)
NM_002657	PLAG1 like zinc finger 2(PLAGL2)
NM_002710	protein phosphatase 1 catalytic subunit gamma(PPP1CC)
NM_002720	protein phosphatase 4 catalytic subunit(PPP4C)
NM_002742	protein kinase D1(PRKD1)
NM_002748	mitogen-activated protein kinase 6(MAPK6)
NM_002753	mitogen-activated protein kinase 10(MAPK10)
NM_002833	protein tyrosine phosphatase, non-receptor type 9(PTPN9)
NM_002911	UPF1, RNA helicase and ATPase(UPF1)
NM_002943	RAR related orphan receptor A(RORA)
NM_002950	ribophorin I(RPN1)
NM_002957	retinoid X receptor alpha(RXRA)
NM_003010	mitogen-activated protein kinase kinase 4(MAP2K4)
NM_003012	secreted frizzled related protein 1(SFRP1)
NM_003042	solute carrier family 6 member 1(SLC6A1)
NM_003070	SWI/SNF related, matrix associated, actin dependent regulator of chromatin, subfamily a, member 2(SMARCA2)
NM_003081	synaptosome associated protein 25(SNAP25)
NM_003105	sortilin related receptor 1(SORL1)
NM_003108	SRY-box 11(SOX11)
NM_003109	Sp1 transcription factor(SP1)
NM_003110	Sp2 transcription factor(SP2)
NM_003112	Sp4 transcription factor(SP4)
NM_003161	ribosomal protein S6 kinase B1(RPS6KB1)
NM_003185	TATA-box binding protein associated factor 4(TAF4)
NM_003288	tumor protein D52 like 2(TPD52L2)
NM_003320	tubby bipartite transcription factor(TUB)
NM_003348	ubiquitin conjugating enzyme E2 N(UBE2N)
NM_003404	tyrosine 3-monooxygenase/tryptophan 5-monooxygenase activation protein beta(YWHAB)
NM_003471	potassium voltage-gated channel subfamily A member regulatory beta subunit 1(KCNAB1)
NM_003502	axin 1(AXIN1)
NM_003507	frizzled class receptor 7(FZD7)
NM_003565	unc-51 like autophagy activating kinase 1(ULK1)
NM_003654	carbohydrate sulfotransferase 1(CHST1)
NM_003692	transmembrane protein with EGF like and two follistatin like domains 1(TMEFF1)
NM_003713	phospholipid phosphatase 3(PLPP3)
NM_003743	nuclear receptor coactivator 1(NCOA1)
NM_003800	RNA guanylyltransferase and 5'-phosphatase(RNGTT)
NM_003822	nuclear receptor subfamily 5 group A member 2(NR5A2)
NM_003872	neuropilin 2(NRP2)
NM_003908	eukaryotic translation initiation factor 2 subunit beta(EIF2S2)
NM_003934	far upstream element binding protein 3(FUBP3)
NM_004036	adenylate cyclase 3(ADCY3)
NM_004060	cyclin G1(CCNG1)
NM_004100	EYA transcriptional coactivator and phosphatase 4(EYA4)
NM_004115	fibroblast growth factor 14(FGF14)
NM_004225	malignant fibrous histiocytoma amplified sequence 1(MFHAS1)
NM_004229	mediator complex subunit 14(MED14)
NM_004232	suppressor of cytokine signaling 6(SOCS6)
NM_004235	Kruppel like factor 4(KLF4)
NM_004241	jumonji domain containing 1C(JMJD1C)
NM_004282	BCL2 associated athanogene 2(BAG2)
NM_004287	golgi SNAP receptor complex member 2(GOSR2)
NM_004379	cAMP responsive element binding protein 1(CREB1)
NM_004386	neurocan(NCAN)
NM_004397	DEAD-box helicase 6(DDX6)
NM_004416	deltex E3 ubiquitin ligase 1(DTX1)
NM_004419	dual specificity phosphatase 5(DUSP5)
NM_004422	dishevelled segment polarity protein 2(DVL2)
NM_004442	EPH receptor B2(EPHB2)
NM_004492	general transcription factor IIA subunit 2(GTF2A2)
NM_004503	homeobox C6(HOXC6)
NM_004535	myelin transcription factor 1(MYT1)
NM_004567	6-phosphofructo-2-kinase/fructose-2,6-biphosphatase 4(PFKFB4)
NM_004635	mitogen-activated protein kinase-activated protein kinase 3(MAPKAPK3)
NM_004687	myotubularin related protein 4(MTMR4)
NM_004755	ribosomal protein S6 kinase A5(RPS6KA5)
NM_004761	ral guanine nucleotide dissociation stimulator like 2(RGL2)
NM_004774	mediator complex subunit 1(MED1)
NM_004840	Rac/Cdc42 guanine nucleotide exchange factor 6(ARHGEF6)
NM_004852	one cut homeobox 2(ONECUT2)
NM_004860	FMR1 autosomal homolog 2(FXR2)
NM_004863	serine palmitoyltransferase long chain base subunit 2(SPTLC2)
NM_004869	vacuolar protein sorting 4 homolog B(VPS4B)
NM_004926	ZFP36 ring finger protein like 1(ZFP36L1)
NM_005037	peroxisome proliferator activated receptor gamma(PPARG)
NM_005045	reelin(RELN)
NM_005110	glutamine-fructose-6-phosphate transaminase 2(GFPT2)
NM_005121	mediator complex subunit 13(MED13)
NM_005161	apelin receptor(APLNR)
NM_005168	Rho family GTPase 3(RND3)
NM_005178	B-cell CLL/lymphoma 3(BCL3)
NM_005180	BMI1 proto-oncogene, polycomb ring finger(BMI1)
NM_005187	CBFA2/RUNX1 translocation partner 3(CBFA2T3)
NM_005207	CRK like proto-oncogene, adaptor protein(CRKL)
NM_005215	DCC netrin 1 receptor(DCC)
NM_005234	nuclear receptor subfamily 2 group F member 6(NR2F6)
NM_005324	H3 histone family member 3B(H3F3B)
NM_005338	huntingtin interacting protein 1(HIP1)
NM_005342	high mobility group box 3(HMGB3)
NM_005374	membrane palmitoylated protein 2(MPP2)
NM_005429	vascular endothelial growth factor C(VEGFC)
NM_005436	coiled-coil domain containing 6(CCDC6)
NM_005458	gamma-aminobutyric acid type B receptor subunit 2(GABBR2)
NM_005477	hyperpolarization activated cyclic nucleotide gated potassium channel 4(HCN4)
NM_005502	ATP binding cassette subfamily A member 1(ABCA1)
NM_005544	insulin receptor substrate 1(IRS1)
NM_005568	LIM homeobox 1(LHX1)
NM_005586	MyoD family inhibitor(MDFI)
NM_005633	SOS Ras/Rac guanine nucleotide exchange factor 1(SOS1)
NM_005665	ecotropic viral integration site 5(EVI5)
NM_005729	peptidylprolyl isomerase F(PPIF)
NM_005730	CTD small phosphatase 2(CTDSP2)
NM_005811	growth differentiation factor 11(GDF11)
[truncated: 344 more rows]
